1 **TGF-beta/Activin ligand Myoglianin couples muscle growth to the initiation of**  
2 **metamorphosis**

3

4

5 Lorrie L. He<sup>1#</sup>, Sara Hyun Joo Shin<sup>1#</sup>, Zhou Wang<sup>1</sup>, Isabelle Yuan<sup>1</sup>, Ruthie Weschler<sup>1</sup>, Allie  
6 Chiou, Takashi Koyama<sup>2,3</sup>, H. Frederik Nijhout<sup>4</sup>, Yuichiro Suzuki<sup>1\*</sup>

7

8

9

10

11

12

13 <sup>1</sup> Department of Biological Sciences, 106 Central St., Wellesley College, Wellesley, MA 02481

14 <sup>2</sup> Instituto Gulbenkian de Ciência, Rua da Quinta Grande, 6, 2780-156 Oeiras, Portugal

15 <sup>3</sup> Department of Biology, University of Copenhagen, Universitetsparken 15, 2100 Copenhagen,  
16 Denmark

17 <sup>4</sup> Department of Biology, Duke University, Durham, NC 27708

18

19 # denotes equal contribution

20 \*Corresponding author: email: [ysuzuki@wellesley.edu](mailto:ysuzuki@wellesley.edu); Tel: (781)283-3100

21

22

23

24

25

26

27

28 ABSTRACT

29 Although the mechanisms that control growth are now well understood, the mechanism by which  
30 animals assess their body size remains one of the great puzzles in biology. The final larval instar  
31 of holometabolous insects, after which growth stops and metamorphosis begins, is specified by a  
32 threshold size. We investigated the mechanism of threshold size assessment in the tobacco  
33 hornworm, *Manduca sexta*. The threshold size was found to change depending on the amount of  
34 exposure to poor nutrient conditions whereas hypoxia treatment consistently led to a lower  
35 threshold size. Under these various conditions, the mass of the muscles plus integuments was  
36 correlated with the threshold size. Furthermore, the expression of *myoglianin* (*myo*) increased at  
37 the threshold size in both *M. sexta* and *Tribolium castaneum*. Knockdown of *myo* in *T.*  
38 *castaneum* led to larvae that underwent supernumerary larval molts and stayed in the larval stage  
39 permanently even after passing the threshold size. We propose that increasing levels of Myo  
40 produced by the growing tissues allow larvae to assess their body size and trigger metamorphosis  
41 at the threshold size.

42

43

44

45 **Keywords**

46 Myoglianin; threshold size; body size; muscle growth; *Manduca sexta*

## 47 BACKGROUND

48 In animals that undergo determinate growth, the juvenile stage, during which growth  
49 occurs, is separated from the adult stage. The two stages are often separated by a major  
50 developmental transition, such as puberty or metamorphosis, which involves physiological,  
51 morphological and behavioral changes. Because these developmental transitions occur once the  
52 juveniles have grown to a particular body size, organisms must have evolved mechanisms to  
53 assess their body size. Although the molecular, genetic and physiological mechanisms that  
54 control growth, puberty and metamorphosis are now well-known, the mechanism by which  
55 animals assess their body size and determine when to stop growing remains a major unresolved  
56 issue in developmental biology.

57 Holometabolous insects, insects that undergo complete metamorphosis, exhibit  
58 determinate growth. These insects grow by undergoing several molts. At the end of the last larval  
59 stage, they stop feeding and growing, and metamorphose into the pupal and adult stages that do  
60 not grow. The size a larva attains during the last larval instar therefore defines the size of the  
61 adult insect. Previous studies have shown that the decision to stop growing and begin  
62 metamorphosis is marked by the attainment of a precise body size called the threshold size  
63 (Nijhout, 1975).

64 The threshold size was first identified in the tobacco hornworm, *Manduca sexta* (Nijhout,  
65 1975). *M. sexta* typically undergo five larval instars in laboratory conditions. However, when *M.*  
66 *sexta* larvae are fed a low-nutrient diet, larvae grow more slowly and can undergo 1, 2 or 3  
67 additional instars before entering metamorphosis. The threshold checkpoint occurs at the  
68 beginning of each instar (Kingsolver, 2007; Nijhout, 1975). A larva below the threshold size at  
69 the beginning of an instar will undergo additional molts and increase its body size. Once a larva  
70 is above the threshold size when it molts, it enters the last larval instar and will metamorphose at  
71 the end of that instar (Kingsolver, 2007; Nijhout, 1975).

72 Artificial selection on body size has demonstrated that threshold size can evolve,  
73 indicating that there is a genetic component to the mechanism that determines the threshold size  
74 (Grunert et al., 2015). There are two equivalent measures that can detect threshold size: It can be  
75 measured as the width of the head capsule, or as the mass of a larva at the beginning of the instar  
76 (Grunert et al., 2015; Nijhout, 1975). Both measures are equivalent. Thus, some mechanism of  
77 size sensing must exist that is somehow associated with these measures of body size.

78           Recent studies have identified several molecular regulators whose disruption causes  
79 supernumerary molts or precocious metamorphosis. These molecular regulators affect the  
80 production of, or sensitivity to, juvenile hormone (JH). JH modifies the actions of the molting  
81 hormone, 20-hydroxyecdysone, to prevent the organism from progressing from one life history  
82 stage to the next (Riddiford, 1996). JH acts by binding to the basic helix-loop-helix-Per-Arnt-  
83 Sim domain protein receptor, Methoprene-tolerant (Met) (Konopova and Jindra, 2007). In flour  
84 beetle *Tribolium castaneum*, knockdown of *Met* causes larvae to have reduced sensitivity to JH  
85 and undergo early metamorphosis, forming miniature adults (Konopova and Jindra, 2007).  
86 Silencing the expression of the JH-response gene, *Krüppel homolog (Kr-h1)*, also leads to  
87 precocious metamorphosis in this species (Minakuchi et al., 2009).

88           It has long been known that removing the corpora allata, the glands that secrete JH, can  
89 cause premature metamorphosis, resulting in a dwarf adult. JH-deficient larvae of  
90 holometabolous insects, including *M. sexta*, *T. castaneum* and the silkworm *Bombyx mori*,  
91 undergo precocious metamorphosis (Daimon et al., 2012; Minakuchi et al., 2008; Ohtaki et al.,  
92 1971; Suzuki et al., 2013; Tan et al., 2005). In *T. castaneum*, knockdown of *ventral veins lacking*  
93 (*vvl*) leads to precocious metamorphosis by suppressing the production of JH (Cheng et al.,  
94 2014). Recently, the ecdysone response gene, *E93*, has been shown to be necessary to terminate  
95 JH secretion in order to initiate the onset of metamorphosis; knockdown of *E93* leads to the  
96 induction of supernumerary molts in *T. castaneum* (Chafino et al., 2019). Chafino et al (2019)  
97 demonstrated that in this species, starvation before day 1 of the final instar can induce  
98 supernumerary molts whereas starvation after day 1 does not lead to supernumerary molts.  
99 Chafino et al (2019) suggested that the mass on the first day of the final instar likely corresponds  
100 to the threshold size and demonstrated that it is associated with an increase in *E93* expression  
101 (Chafino et al., 2019). While the methodology used to determine the threshold size is different  
102 from that used in *M. sexta* and the identified stage may be more consistent with the attainment of  
103 irreversible pupal commitment, it is clear that the decision to become a pupa (and hence the  
104 threshold size) is already reached 24 hrs after the molt to the final instar. Although the clearance  
105 of JH is a prerequisite for the decision to metamorphose, removal of JH is likely only to be the  
106 proximate mechanism that allows larvae to initiate metamorphosis and not part of the mechanism  
107 by which a larva *assesses* its size.

108 Hemimetabolous insects are characterized by incomplete metamorphosis, in which  
109 nymphs metamorphose directly into adults. To our knowledge, no study has demonstrated the  
110 existence of a threshold size in this group of insects. In these insects, JH also plays a role in the  
111 timing of adult development. Knockdown of *Kr-h1* in the penultimate nymphal instar of the  
112 firebug, *Pyrrhocoris apterus*, the German cockroach, *Blattella germanica*, and the brown  
113 planthopper, *Nilaparvata lugens*, leads to precocious adult development (Konopova et al., 2011;  
114 Li et al., 2018; Lozano and Belles, 2011). In addition, silencing *myoglianin* (*myo*), a gene coding  
115 for one of the ligands of the TGF-beta/Activin signaling pathway, has been shown to cause extra  
116 nymphal molts (Ishimaru et al., 2016; Kamsoi and Belles, 2019): Increased expression of *myo*  
117 has been shown to trigger the final nymphal instar in *Blattella germanica* (Kamsoi and Belles,  
118 2019). Myo expression in the corpora allata/corpora cardiaca in the fifth (penultimate nymphal)  
119 instar nymphs leads to the repression of the JH biosynthesis gene, *jhamt*, in the sixth (last) instar  
120 nymphs (Kamsoi and Belles, 2019). Likewise, in the field cricket, *Gryllus bimaculatus*, RNA  
121 interference (RNAi)-mediated knockdown of *myo* leads to supernumerary molts accompanied by  
122 an increase in *jhamt* expression (Ishimaru et al., 2016). These studies demonstrate that Myo  
123 regulates JH production in hemimetabolous insects. In addition, Myo has been implicated in  
124 ecdysteroid production as the expression of the ecdysone biosynthesis gene *neverland* decreases  
125 in response to *myo* RNAi (Kamsoi and Belles, 2019).

126 The role of *myo* in holometabolous insects is not well known except for its functions in  
127 muscles (Augustin et al., 2017; Lo and Frasch, 1999). Myo shares a 46% amino acid sequence  
128 identity with the vertebrate Bone Morphogenetic Protein 11 (BMP11 or Growth differentiation  
129 factor 11 (GDF11)) and Myostatin (or GDF8) (Lo and Frasch, 1999). In vertebrates, Myostatin  
130 was first isolated in mice and characterized for its role in halting skeletal muscle growth  
131 (McPherron et al., 1997; Whitemore et al., 2003). In *Drosophila*, Myo is expressed in  
132 embryonic muscles as well as glial cells (Lo and Frasch, 1999). During the larval stage, Myo acts  
133 like Myostatin at the neuromuscular junction (NMJ) to suppress synaptic transmissions and NMJ  
134 growth and branching (Augustin et al., 2017). In addition, knockdown of muscle-derived *myo*  
135 leads to increased muscle size and overall body size, indicating that Myo inhibits muscle growth  
136 (Augustin et al., 2017). However, *myo* mutant *Drosophila* larvae do not undergo extra larval  
137 molts (Augustin et al., 2017). In fact, unlike most other insects, the final instar *Drosophila* larvae  
138 do not respond readily to JH; topical application of JH fails to dramatically delay metamorphosis

139 and does not induce supernumerary molts (Riddiford and Ashburner, 1991). Thus, identification  
140 of threshold size is challenging in this species. In summary, although molecular disruptions that  
141 cause precocious metamorphosis or supernumerary molts have been identified, none of these  
142 answer the question of how size is assessed so that metamorphosis occurs at the correct species-  
143 specific body size.

144 In this study, we sought to examine how *M. sexta* larvae assess their body size to initiate  
145 metamorphosis. Our approach was to utilize two distinct methods to generate a wide range of  
146 body sizes at the end of the fourth instar (penultimate instar under laboratory conditions):  
147 nutrient-deprivation and hypoxia. As mentioned above, nutrient-deprivation is the standard way  
148 by which threshold size has been determined in *M. sexta*. Aside from nutrient deprivation,  
149 previous studies have shown that hypoxia can also stunt growth in most insect species, including  
150 *M. sexta* (Callier and Nijhout, 2011; Frazier et al., 2001; Greenberg and Ar, 1996). We therefore  
151 exposed larvae at different instars to hypoxic conditions to generate a range of fourth instar  
152 larval sizes. We then sought to identify traits that correlate with the attainment of the threshold  
153 size under both nutrient-deprivation and hypoxia conditions to narrow down the potential  
154 molecular regulators involved in threshold size determination.

155 We found that nutrient deprivation at different times of larval development leads to  
156 distinct threshold sizes and found that the relative muscle/integument mass is correlated with the  
157 attainment of the threshold size. We also show that *myo* is expressed differentially in  
158 muscles/integuments of pre-threshold size larvae relative to that of post-threshold size larvae.  
159 Because knockdown of gene expression *in vivo* is not possible in *M. sexta*, we explored the  
160 function of *myo* in another holometabolous insect, the flour beetle *T. castaneum*, where RNAi is  
161 possible (Tomoyasu and Denell, 2004). We demonstrate that *myo* dsRNA-injected larvae  
162 continue to molt into supernumerary larval instars and never initiate metamorphosis even after  
163 surpassing the threshold size, indicating that *myo* is the signal by which body size is sensed and  
164 that triggers the transition between growth and metamorphosis.

## 165 RESULTS

### 166 *Effect of nutrient deprivation on the threshold size*

167 Under standard laboratory rearing conditions, *M. sexta* larvae invariably undergo five  
168 larval instars. This precludes us from determining the threshold size. Thus, the standard way to

169 determine the threshold size is to temporarily starve larvae or to feed larvae a diet containing a  
170 reduced amount of protein to generate large variability in size (Grunert et al., 2015; Nijhout,  
171 1975). Here, we used both methods to determine the threshold size. First, larvae were fed an  
172 experimental diet with reduced levels of protein (40% diet) starting the second instar. These  
173 larvae had a threshold size of approximately 0.85 g (Fig. 1A, 1C). In contrast, shifting the timing  
174 of nutrient deprivation altered the threshold size. When larvae were starved during the third  
175 instar after one day of feeding, or when third instar larvae were placed on 40% diet temporarily  
176 and returned to the normal diet at the end of the third instar, larvae had a reduced threshold size:  
177 Larvae on the 40% diet only in the third instar and larvae starved in the third instar had a  
178 threshold size of approximately 0.65 g and 0.75 g, respectively (Fig. 1A, C). Thus, the timing of  
179 nutrient deprivation appears to affect the threshold size.

180

### 181 *Hypoxia generates supernumerary larvae*

182 Hypoxia has also been demonstrated to slow down the growth rate (Callier et al., 2013;  
183 Harrison et al., 2015). Therefore, we exposed third instar larvae to hypoxia to see if we could  
184 generate smaller larvae. After exposure to hypoxia, fourth instar larvae were returned to  
185 normoxic conditions and weighed daily until the beginning of the wandering stage, which  
186 indicates the onset of metamorphosis (Fig. S1A). These larvae grew to a smaller size at the end  
187 of the fourth instar and had two distinct fates: at the end of the fifth instar, 40% of the larvae  
188 (n=61) underwent a supernumerary larval molt, and the remaining larvae entered the wandering  
189 stage (n=90) (Fig. S1B). Larvae exposed to hypoxic conditions during the third instar that  
190 wandered at the end of the fifth instar had a fourth instar feeding period of 3.0 days, similar to  
191 the average feeding time of normoxic control larvae, which took 2.9 days (Fig. S2). In contrast,  
192 larvae that underwent a supernumerary molt at the end of the fifth instar had a significantly  
193 reduced fourth instar feeding period of 2.0 days (Fig. S2; One-way ANOVA:  $F(2,159)=125.556$ ,  
194  $p<0.0001$ ). Thus, the feeding duration of the fourth instar is a significant predictor of the nature  
195 of the molt that occurs at the end of the fourth instar.

196 The weights at the end of the fourth instar are highly predictive of the fate of the molt,  
197 indicating that the threshold size checkpoint occurs at the end of the fourth instar, similar to the  
198 nutrient-deprivation conditions (Fig. S3A, B). The mass at the end of the third instar is not  
199 predictive of the mass at the end of the fourth instar (Fig. S3C). In the hypoxia-treated larvae, the

200 threshold size is approximately 0.65 g (Fig. 2, S3B, C), similar to that of larvae reared under  
201 normoxia/low-nutrient conditions only during the third instar.

202 Since our nutrient deprivation study indicated that the threshold size can shift depending  
203 on the timing of nutrient deprivation, we reared fourth instar larvae in hypoxic conditions instead  
204 of third instar larvae and observed whether the threshold size changed. Under these conditions,  
205 the threshold size was also approximately 0.65 g, similar to the threshold size of larvae exposed  
206 to hypoxia during the third instar (Fig. 2A, C). Thus, it appears that the timing of hypoxia  
207 treatment does not alter the threshold size.

208

### 209 *Muscle mass is correlated with threshold size attainment*

210 Because we determined that distinct nutritional conditions can affect the threshold size,  
211 we hypothesized that the size of a growing body part might contribute to threshold size  
212 determination. Two tissues that grow extensively throughout an instar are the fat body and the  
213 muscles. We therefore determined the muscle/integument mass and fat body mass for the third  
214 instar hypoxia-treated larvae and larvae fed a 40% diet throughout much of the early larval  
215 instars as these two treatments reliably generate fourth instar larvae with masses close to the  
216 threshold size and lead to distinct threshold sizes. We also determined the muscle/integument  
217 mass and fat body mass at the end of the third and fourth instar larvae reared under  
218 normoxia/normal diet conditions.

219 Although the third and fourth instar normoxia/normal diet-fed larvae are at the extreme  
220 ends of the size range, the hypoxia-treated and normoxia/normal diet-fed larvae appear to have  
221 similar muscle/integument mass relative to the wet mass, indicating that the muscle grows  
222 similarly in hypoxia-treated and normoxia/normal diet-fed larvae (Fig. 3A). In contrast, the  
223 larvae fed a 40% diet had smaller relative mass of the muscles/integuments than hypoxia-treated  
224 and normoxia/normal diet-fed larvae (Fig. 3A). We found that the relative mass of the  
225 muscles/integuments was larger for hypoxia-treated larvae than larvae fed a 40% diet, and a  
226 significant wet mass X treatment interaction was observed (ANCOVA:  $F(1,39) = 13.016$ ,  
227  $p < 0.001$ ; Fig. 3A). Intriguingly, the mass of the muscles/integuments at the threshold size for  
228 both the hypoxia-treated larvae and the 40% diet-fed larvae were similar. In contrast, fat body  
229 mass scaled with whole body mass similarly in both environmental conditions, and there was no  
230 significant wet mass X treatment interaction (ANCOVA:  $F(1,39) = 0.0142$ ,  $p = 0.906$ ; Fig. 3B).



231 Together, these results suggest that muscle/integument mass is correlated with attainment of  
232 threshold size.

233

234 *myo* expression in muscles is correlated with the attainment of threshold size

235         Given that the integument/muscle mass was correlated with the attainment of threshold  
236 size, we hypothesized that the growing muscles might produce a factor that signals the switch  
237 from the growth phase to the metamorphic onset. We reasoned that this signal would have to be  
238 expressed differentially between pre-threshold size and post-threshold size larvae reared under  
239 normoxia/normal diet, hypoxia and nutrient-deprivation conditions. We also suspected that the  
240 signal might be secreted in order to be able to communicate with the rest of the body. Finally, we  
241 reasoned that this factor would need to be expressed in the muscle. Given that Myo is expressed  
242 in the muscles (Augustin et al., 2017; Lo and Frasch, 1999) and its removal leads to  
243 supernumerary molts in hemimetabolous insects (Kamsoi and Belles, 2019), we suspected that  
244 Myo might be a potential candidate factor. We identified three Activin ligand genes in the *M.*  
245 *sexta* genome. The predicted amino acid sequences were used to verify the identity of the Myo-  
246 coding gene (Fig. S4). The alignment of *M. sexta* Myo is shown in Fig. S5.

247         We first examined the *myo* expression in the anterior portion (containing the brain and  
248 thoracic structures) of second, third and fourth instar larvae undergoing a molt using quantitative  
249 RT-PCR (qPCR). We found that the expression of *myo* increased with each molt (Fig. 4A). To  
250 examine how the tissue-specific expression of *myo* changes between larvae at the end of the third  
251 instar (under the threshold size) and those at the end of the fourth instar (above the threshold  
252 size), the muscles, fat body and CNS were dissected from larvae reared under standard rearing  
253 conditions. We observed a significant increase in the expression of *myo* in the muscles (Student's  
254 t-test:  $t(6)=2.82$ ,  $p<0.05$ ), but no significant increase was detected in the fat body (Student's t-  
255 test:  $t(6)=0.637$ ,  $p=0.55$ ) and the CNS (Student's t-test:  $t(5)=0.417$ ,  $p=0.69$ ) (Fig. 4B-D). Thus,  
256 an increase in *myo* expression in the muscle was correlated with the attainment of threshold size  
257 in normoxia/normal diet-fed larvae.

258         To further explore this correlation, we examined the tissue-specific expression of *myo* in  
259 muscles, fat body and CNS of the pre- and post-threshold size larvae in both hypoxia-treated and  
260 40% diet-fed fourth instar larvae. We found significantly higher expression of *myo* in muscles of  
261 post-threshold size larvae than in pre-threshold size larvae in both hypoxia-treated and 40% diet

262 fed larvae (Fig. 5; Student's t-test:  $t(8)=3.65$ ,  $p<0.01$  for hypoxia;  $t(8)=3.98$ ,  $p<0.005$  for 40%  
263 diet). In the fat body, significantly higher expression of *myo* was observed in the post-threshold  
264 size fat body of 40% diet fed larvae relative to pre-threshold size larvae (Student's t-test:  
265  $t(7)=3.41$ ,  $p<0.05$ ). However, in hypoxia-treated larvae, no statistically significant differences  
266 were observed although post-threshold size larvae tended to have higher *myo* expression  
267 (Student's t-test:  $t(8)=1.43$ ,  $p=0.19$ ). In contrast, no difference in *myo* expression was observed  
268 in the CNS of pre- or post-threshold size larvae under both hypoxia and 40% diet conditions  
269 (Fig. 5; Student's t-test:  $t(8)=1.01$ ,  $p=0.34$  for hypoxia;  $t(8)=1.09$ ,  $p=0.31$  for 40% diet).

270 To confirm the correlation between *myo* in the muscles and the attainment of threshold  
271 size, we isolated muscles and fat body from hypoxia-treated and 40% diet-fed larvae weighing  
272 between 0.7g and 0.8g. In this weight range, hypoxia-treated larvae are above the threshold size  
273 whereas 40% diet-fed larvae are below the threshold size. We found that *myo* expression was  
274 significantly higher in the muscles of hypoxia-treated larvae than that of 40% diet-fed larvae  
275 (Fig. 5C; Student's t-test:  $t(6)=4.36$ ,  $p<0.005$ ). In contrast, *myo* expression in the fat body did not  
276 differ significantly (Fig. 5C;  $t(6)=1.05$ ,  $p=0.34$ ). Taken together, the attainment of threshold size  
277 is consistently correlated with elevated *myo* expression in the muscles/integuments under all  
278 experimental conditions.

279

### 280 *JH does not shift the threshold size*

281 Previous studies have suggested that a decline in JH may underlie threshold size  
282 attainment in other insects (Chafino et al., 2019). To determine whether JH affects threshold size  
283 attainment in *M. sexta*, larvae were placed in hypoxic conditions during the third instar until  
284 HCS and then treated with 10  $\mu$ g methoprene, a JH analog, two days later. These larvae typically  
285 underwent a molt approximately 1-3 days after treatment. The fates of the larvae were tracked to  
286 see if they underwent an extra molt or initiated wandering. We found that the threshold size was  
287 around 0.67 g (Fig. S6A). This is similar to that of the hypoxia-treated larvae without  
288 methoprene treatment, indicating that methoprene treatment does not shift the threshold size. All  
289 methoprene-treated larvae, including those that were destined to undergo metamorphosis at the  
290 end of the fifth instar, showed complete loss of melanic markings that are normally visible in the  
291 fifth instar (Fig. S6B, C), suggesting that JH signaling was active. Thus, while methoprene  
292 clearly had the expected effect on the body coloration, it did not alter the threshold size.

293 Together, these data indicate that *myo* expression is correlated with the attainment of threshold  
294 size, and that methoprene treatment before threshold size attainment is insufficient to shift the  
295 threshold size.

296

297 *myo knockdown in Tribolium leads to indefinite molts*

298 Because gene manipulation is not possible in *M. sexta*, we explored the role of *myo* in *T.*  
299 *castaneum*, a species where RNAi is possible. In *Tribolium*, even under normal rearing  
300 conditions, the total number of instars can vary, and like in *M. sexta*, the timing of  
301 metamorphosis is determined by a drop in JH. In our laboratory, the GA-1 strain typically  
302 undergoes 7 or 8 instars. A recent study has shown that by day 1 of the final instar, the decision  
303 to pupate and hence the threshold size has already been reached (14). We weighed larvae 1 day  
304 after a molt and determined their fates. When larvae weighed above 2.1 g, 50% of the larvae  
305 initiated metamorphosis (Fig. 6A), indicating that if larvae are above 2.1 g, they have already  
306 reached the threshold size.

307 The *myo* homolog was identified in the *Tribolium* genome and clusters with other Myo  
308 homologs in other insects (Fig. S4, S5). We examined the expression of *myo* in freshly molted  
309 sixth instar (below the threshold size) or freshly molted final instar larvae weighing at least 2.2  
310 mg (above the threshold size). To do this, we removed the gut and the fat body and examined the  
311 expression in the rest of the body (containing the CNS, muscles and integuments). We found a  
312 small but significant increase in *myo* expression in the seventh instar larvae (Fig. 6B; Student's t-  
313 test:  $t(6)=3.02$ ,  $p<0.05$ ).

314 To functionally characterize the role of *myo*, we injected *amp<sup>r</sup>* and *myo* dsRNA into  
315 larvae. Knockdown verification experiments demonstrated that *myo* dsRNA successfully  
316 knocked down the expression of *myo* (Fig. 7A). Eleven out of 18 *amp<sup>r</sup>* RNAi larvae injected in  
317 the sixth instar pupated after the seventh instar while four larvae pupated after the eighth instar  
318 (Table 1). *amp<sup>r</sup>* dsRNA-injected seventh instar larvae all underwent pupation without a larval-  
319 larval molt ( $n=7$ ; Table 1). Knockdown of *myo* did not induce visible morphological changes.  
320 However, larvae injected with *myo* dsRNA as sixth instars continued to molt indefinitely, and  
321 those injected as seventh instars never molted; none of these larvae ever entered the prepupal  
322 stage ( $n=18$ ; Table 1). In addition, the intermolt period was significantly increased (Fig. 7B).  
323 Overall, the larval duration of *amp<sup>r</sup>* dsRNA-injected larvae was 12 days whereas *myo* dsRNA-

324 injected larvae stayed at the larval stage for up to 7 months before dying (Fig. 7C). When a  
325 subset of the larvae was weighed and their fates were assessed, we found that *myo* dsRNA-  
326 injected larvae grew at a slower rate than the *amp<sup>r</sup>* dsRNA-injected larvae (Fig. 7D). However,  
327 the *myo* dsRNA-injected larvae continued to molt as supernumerary larvae even when they  
328 weighed more than the mass of irreversible pupal commitment (i.e. 2.1 mg) one day after the  
329 molt and should have pupated (Fig. 7E). In contrast, *amp<sup>r</sup>* dsRNA-injected larvae weighing more  
330 than 2.1 mg one day after the molt pupated at the end of the instar (Fig. 7E). These observations  
331 indicate that *myo* dsRNA-injected larvae continued to undergo supernumerary molts even after  
332 reaching the size when larvae are normally pupally committed, thus supporting the idea that Myo  
333 is the signal that mediates the switch between growth and metamorphosis.

## 334 DISCUSSION

335 In this study, we investigated the mechanism by which insects sense their body size and  
336 initiate the switch from larval growth to metamorphosis. We found that hypoxia-treatment and a  
337 nutrient-deficient diet can both alter threshold sizes in *M. sexta*. The muscle/integument mass  
338 was found to be correlated with threshold size: although the relative size of muscles/integuments  
339 was greater in hypoxia-treated larvae than that in nutrient-deprived larvae, the same absolute  
340 muscle/integument mass was observed at their respective threshold sizes. We found that *myo*  
341 expression increases significantly in the muscles during development. Moreover, in the muscles,  
342 the expression of *myo* was significantly higher in post-threshold size larvae than in pre-threshold  
343 size larvae under both hypoxia and 40% nutrient treatments. *myo* RNAi knockdown in *T.*  
344 *castaneum*, led to permanent indefinite supernumerary larval-larval molts even in larvae that  
345 were larger than the threshold size. Based on these findings, we propose that Myo is the signal  
346 by which larvae can assess their body size.

347

### 348 *A nutrient-dependent pathway regulates the threshold size*

349 Because the threshold size sets the number of larval instars, the size at metamorphosis  
350 and the size of the adult, the threshold size is arguably the most important determinant of final  
351 body size. In this study, we found that prolonged exposure to reduced nutrient-diet increases the  
352 threshold size (Fig. 1). When larvae were nutritionally deprived during the third instar, the  
353 threshold size ranged between 0.65 g to 0.75g. However, when larvae were fed a 40% diet

354 throughout much of the larval instar, the threshold size increased to 0.85 g. Poor nutrient  
355 conditions throughout much of the growth period, or recovery from starvation during the third  
356 instar, therefore increase the threshold size, suggesting that a nutrient-dependent process likely  
357 contributes to the determination of threshold size. In contrast, hypoxia treatment does not reduce  
358 the threshold size as larvae reared in hypoxic conditions in either the third or the fourth instar  
359 had a threshold size of approximately 0.65 g, similar to larvae that had been fed a 40% diet  
360 during the third instar. These findings indicate that 0.65 g may be the “actual” threshold size  
361 under normal nutrient conditions.

362 We discovered that the mass of the muscles/integuments is correlated with threshold size  
363 in both hypoxia-treated larvae and nutrition-deprived larvae. The relative muscle/integument  
364 mass at threshold size of hypoxia-treated larvae is greater than the relative muscle/integument  
365 mass in nutrition-deprived larvae, which have a larger threshold size. Furthermore, the  
366 muscle/integument masses at the threshold size of hypoxia-treated and nutrition-deprived larvae  
367 are similar. Such correlations are not observed in the fat body mass. These observations indicate  
368 that muscle/integument mass serves as a good proxy for body size and the threshold size. Since  
369 only the muscle showed consistent increase of *myo* expression in post-threshold size larvae, we  
370 think that the expression of *myo* in the muscle is the key signal by which insects assess their  
371 body size.

372

### 373 *Myo mediates the transition between growth and metamorphosis*

374 Using *T. castaneum*, we found that *myo* RNAi leads to indefinite larval-larval molts. The  
375 *myo* dsRNA-injected larvae grew slower compared to the *amp<sup>r</sup>* dsRNA-injected larvae.  
376 However, these larvae continued to molt as larvae even when they had reached a mass that  
377 normally would have initiated prepupal development. Thus, these larvae clearly had reached the  
378 threshold size but were unable to molt into the final instar.

379 Based on our findings, we propose that Myo couples the attainment of threshold size to  
380 the initiation of metamorphosis (Fig. 8). We found that *myo* expression in the muscles increases  
381 during the growth phase and is consistently expressed at significantly higher levels in muscles of  
382 post-threshold size larvae. The muscle size is a reliable proxy for body size, and the correlated  
383 increase in *myo* serves as a signal of body size. Thus, we propose that Myo levels in muscles  
384 provide a molecular readout of body size. Upon the attainment of a threshold size, the muscles

385 produce enough Myo to signal to the neuroendocrine center to switch from the growth phase to  
386 initiate the physiological processes of metamorphosis. At this point, we do not yet know if Myo  
387 levels in the hemolymph stimulate the neuroendocrine glands directly or via another relay system  
388 like the nervous system. For example, Myo has been shown to inhibit neuromuscular junction  
389 development and synaptic transmission in *D. melanogaster* (Augustin et al., 2017). Thus, it is  
390 possible that the signals are transmitted neuronally to the brain or to the corpora cardiaca/corpora  
391 allata.

392 Taken together, our study demonstrates that one single signaling molecule couples  
393 growth to the initiation of metamorphosis and ensures that metamorphosis is triggered when a  
394 larva passes the threshold size. Such a model would explain the sharp and precise transition in  
395 fates of larvae at the threshold size.

396 *myo* RNAi has also been conducted in hemimetabolous insects: In both the cricket, *G.*  
397 *bimaculatus*, and the cockroach, *B. germanica*, silencing *myo* leads to multiple supernumerary  
398 nymphal molts, often leading to larger body masses (Ishimaru et al., 2016; Kamsoi and Belles,  
399 2019). Thus, in both hemimetabolous and holometabolous insects, *myo* may act as the switch  
400 that mediates allows juveniles to shift from the growth phase to the reproductive phase once the  
401 animal has reached a specific size threshold. It will therefore be of interest to determine whether  
402 a threshold size can be identified in hemimetabolous insects.

403 Finally, JH-deficient larvae of *T. castaneum* and *B. mori* must undergo at least three  
404 larval molts to produce an unknown “competence factor” that allows them to initiate  
405 metamorphosis (Daimon et al., 2015; Smykal et al., 2014). Whether or not Myo is related to the  
406 “competence factor” is unclear at this point.

407  
408 *JH does not affect threshold size of M. sexta*

409 When we applied JH during the fourth instar of *M. sexta*, we observed that the threshold  
410 size could not be shifted (Fig. S6). Thus, we believe that JH is not the primary regulator of  
411 threshold size in *M. sexta*. Instead, JH is a downstream effector that mediates the decision to  
412 metamorphose post-threshold size attainment.

413 A previous study has suggested that threshold size in *T. castaneum* might be regulated by  
414 JH (Chafino et al., 2019). However, in that study, the threshold size was identified by starving  
415 larvae at various sizes during the final instar and identifying the size above which the larva

416 initiates metamorphosis. Whether this size checkpoint is equivalent to the threshold size  
417 checkpoint remains unclear. While the clearance of JH is necessary to initiate metamorphosis,  
418 the threshold size assessment must occur earlier. Myo has been shown to act upstream of JH  
419 signaling in hemimetabolous insects: *myo* knockdown leads to an increase in *jhamt* expression in  
420 the corpora cardiaca/corpora allata (Kamsoi and Belles, 2019). Thus, Myo is likely the threshold  
421 size determinant that ultimately causes a drop in JH titer.

422 *T. castaneum* and *M. sexta* differ in their response to nutrient manipulations in younger  
423 larvae. In *T. castaneum*, feeding larvae on flour that has been diluted to 20% during the fifth  
424 instar leads to a lack of molt and eventual metamorphosis, similar to a bail-out response seen in  
425 other beetles (Nagamine et al., 2016; Shafiei et al., 2001; Terao et al., 2015). *M. sexta* does not  
426 appear to exhibit this type of bail-out response as they either molt or die when nutrients are  
427 removed. The bail-out response seen in *T. castaneum* likely represents an adaptive response that  
428 is absent in *M. sexta*.

429

#### 430 *Conserved functions of Myo in T. castaneum and other insects*

431 In addition to the role of Myo during the threshold size checkpoint, *myo* knockdown in *T.*  
432 *castaneum* revealed additional functions of Myo that are conserved across insects. When *myo*  
433 was knocked down in *T. castaneum*, the intermolt period was dramatically increased, with some  
434 larvae taking a month to molt. Normally, the intermolt period is around five days. Thus, *myo*  
435 knockdown delays the onset of a molt, presumably through a decrease in ecdysteroidogenesis.  
436 Activin signaling has previously been shown to affect ecdysteroidogenesis in both *B. germanica*  
437 and *D. melanogaster* (Gibbens et al., 2011; Santos et al., 2016). Thus, the role of Activin  
438 signaling on ecdysteroidogenesis appears to be conserved across various insect species.

439 In addition, we observed that when Myo was silenced, the larva grew slower, indicating  
440 that it promotes growth. This growth promoting function of Myo appears to be conserved in most  
441 insects (Ishimaru et al., 2016; Kamsoi and Belles, 2019). The only exception is found in *D.*  
442 *melanogaster*, where an opposite effect is observed: In *D. melanogaster*, knockdown of *myo* in  
443 the muscles leads to a larger larval size whereas overexpression of *myo* in the muscles leads to  
444 smaller larval body size without affecting the developmental time (Augustin et al., 2017). In this  
445 species, the functions of TGF-beta ligands appear to be switched with *Activin-beta* playing a  
446 growth promoting role, similar to the growth-promoting role of *myo* in other insect species: the

447 loss-of-function mutation in the *Activin-beta* gene leads to smaller muscle and adult body size in  
448 *Drosophila* without affecting the timing of metamorphosis (Moss-Taylor et al., 2019). Thus, the  
449 growth promoting roles of TGF-beta ligands may have been switched in the lineage leading to *D.*  
450 *melanogaster*. Such switches in function have also been reported for other TGF-beta ligands  
451 (Namigai and Suzuki, 2012).

452

### 453 *Implications for mammalian growth*

454 Body size regulation in insects also has many parallels to size regulation in mammals.  
455 Puberty in mammals, like metamorphosis in insects, is initiated upon reaching a specific  
456 threshold size, and its onset is affected by body size and nutritional status (Hirsch and Batchelor,  
457 1976). Obesity in children leads to precocious pubertal onset, a public health issue that is  
458 affecting US youths (Burt Solorzano and McCartney, 2010; Euling et al., 2008). While being  
459 overweight can lead to precocious puberty, we do not know if the threshold size itself is shifted  
460 under altered nutritional regimes. Based on our study, we hypothesize that the precocious  
461 pubertal onset may be a product not only of precocious attainment of body size but potentially  
462 also of an adjustment of the threshold size itself. Whether the vertebrate homologs of Myo,  
463 BMP-11/GDF-8, mediate the transition between pre-pubertal growth and puberty has not been  
464 clearly demonstrated although a polymorphism in GDF-8 has recently been shown to delay  
465 puberty in cows (Cushman et al., 2015). Additional studies are necessary to demonstrate whether  
466 an evolutionarily conserved mechanism is involved in the regulation of determinate growth.

467

### 468 **CONCLUSION**

469 In this study, we sought to identify the mechanism by which larvae assess their body size.  
470 Specifically, we investigated mechanism by which larvae sense the threshold size, the first size  
471 check point that determines the timing of metamorphosis. Muscle growth and the expression of  
472 the *myo* in the muscles are linked to the attainment of the threshold size, the earliest body size  
473 checkpoint for metamorphosis.

474



475

## 476 METHODS

### 477 *Animal rearing*

478 Wildtype *M. sexta* were obtained from Carolina Biological Supply Company. Larvae were fed a  
479 standard artificial diet as described previously (Kemirembe et al., 2012) unless otherwise noted.  
480 Larvae were raised in individual plastic cups at 26.5°C and a 16:8 hr light:dark cycle. Larvae  
481 were kept in 1 oz soufflé cups until the end of the fourth instar, when they were moved to a 5 oz  
482 soufflé cup. The end of an instar can be clearly identified in this species when the head capsule  
483 begins to slip (denoted “HCS” for head capsule slippage) as the larva initiates a molt. Wildtype  
484 GA-1 strain *Tribolium castaneum* beetles were raised on organic whole wheat flour  
485 supplemented with 5% nutritional yeast and 0.5% fumagilin at 29.5°C and ~55% humidity.

486

### 487 *Hypoxia treatment*

488 *M. sexta* larvae subjected to hypoxia treatments were moved to an airtight cell culture chamber  
489 immediately after molting into either the third or the fourth instar and kept in cups with multiple  
490 holes in the lid. A 5% oxygen/carbon dioxide mixture was sent into the chamber and oxygen  
491 levels were kept at approximately 4±1% throughout the experiment. Larvae were removed from  
492 the chamber at the end of the instar, after which the artificial diet was replaced with fresh diet,  
493 and multi-holed lids were exchanged for single-holed lids.

494

### 495 *Effects of nutrients on threshold size*

496 To assess the effects of nutrition on growth and threshold size, larvae were removed from the  
497 standard artificial diet and placed onto experimental diets or subjected to starvation conditions at  
498 the onset of the third or fourth instar. The experimental diet contained 40% the amount of dietary  
499 protein compared to the standard diet by having reduced levels of wheat germ and casein (Table  
500 S1). Larvae subjected to starvation conditions were removed from the standard diet 24 hrs after  
501 molting into the third instar and placed onto a moistened Kimwipe, which served as a water  
502 source. All larvae were returned to the standard artificial diet when they initiated HCS.

503

### 504 *Methoprene treatment*

505 To test the effect of JH on threshold size, third instar larvae were hypoxia-treated at the onset of  
506 the third instar as described above. Two days after the onset of third instar HCS, 1  $\mu$ l of  
507 methoprene (Sigma) dissolved in acetone (10  $\mu$ g/ $\mu$ l) was applied topically on the dorsal side of  
508 the fourth instar. These larvae were weighed at fourth instar HCS and subsequently tracked to  
509 see if they entered the wandering stage – an early indication of the onset of metamorphosis – or  
510 initiated another molt to determine the threshold size.

511

#### 512 *Threshold size determination*

513 To determine how varying growth conditions altered the threshold size, *M. sexta* larvae were  
514 subjected to varying nutritional or hypoxic conditions, and their growth was followed. Subjecting  
515 larvae to these sub-optimal growth conditions generates larvae above and below threshold size at  
516 the end of the fourth instar, and threshold size can be determined by plotting their developmental  
517 fate against their mass at that time. Larvae were moved onto experimental diets at the onset of  
518 the third or fourth instar or subjected to starvation or hypoxic conditions as described above.  
519 Larvae were checked daily, starting on the day of HCS into the fourth or fifth instar, for third or  
520 fourth instar hypoxia-treated larvae, respectively. Observations continued until larvae initiated  
521 HCS into a supernumerary instar or exhibited signs of metamorphosis, as indicated by a purging  
522 of the gut contents and development of a darkened dorsal vessel. The percentage of larvae that  
523 entered final larval instars was plotted against mass at the time of the fourth HCS and fitted to a  
524 sigmoidal growth curve. For each treatment, the mass at which 50% of the larvae entered the  
525 final instar was determined to be the threshold size.

526

#### 527 *Muscle and fat body mass*

528 After the larvae were weighed, they were dissected in 1X phosphate-buffered saline (PBS; 0.15  
529 M NaCl, 0.0038 M NaH<sub>2</sub>PO<sub>4</sub>, 0.0162 M Na<sub>2</sub>HPO<sub>4</sub>; pH 7.4). The gut, central nervous system  
530 (CNS) and other tubular structures were removed. The fat body was then carefully removed and  
531 placed on an aluminum foil, dried at 60°C for at least 48 hrs, and then weighed. The rest of the  
532 larval body, representing the combination of muscles and integuments, was also dried and  
533 weighed.

534

535 *RNA isolation and cDNA synthesis*

536 To determine the expression of *myo* at the end of various instars, RNA was isolated from the  
537 anterior half of the larva (including the head and the thorax) at the onset of HCS when the head  
538 capsule was still fluid filled and mandibles were white; three biological replicates were created  
539 for each time point. To determine the expression of *myo* in pre-threshold size and post-threshold  
540 size larvae, larvae were either placed on 40% diet once they molted into the second instar or  
541 placed in hypoxia conditions for the duration of the third instar. Muscles, fat body and CNS were  
542 dissected from *Manduca* at the onset of HCS in the fourth instar in 1X PBS. To isolate RNA,  
543 tissues were homogenized in 500  $\mu$ L of TRIzol reagent (Thermo Fisher). After extracting RNA  
544 using chloroform, the RNA was treated with DNase (RQ1 RNase-Free DNase, Promega) to  
545 remove remaining traces of genomic DNA. The First Strand cDNA Synthesis Kit (Thermo  
546 Fisher) was used to convert 1  $\mu$ g of RNA to cDNA via reverse transcription.

547

548 *Quantitative polymerase chain reaction (qPCR)*

549 SYBR Green Supermix (Bio-Rad) and qPCR primers (Table 2) were used for qPCR. To measure  
550 *myo* expression, primers targeting the *Manduca* homolog of the *Drosophila myo* gene (Genbank  
551 accession no. XM\_030169402.1), were designed. Each replicate was assayed in triplicate with  
552 no-template controls. *RpL17A* was used as an internal control gene, and a standard curve method  
553 was used to analyze the data. JMP (SAS Institute, Cary, NC) was used for statistical analyses.

554

555 *Double-stranded RNA (dsRNA) synthesis*

556 *T. castaneum myo* gene (Genbank accession nr: XM\_961726.3) was amplified using the primer  
557 set listed in Supplemental Table 1. The PCR product was inserted into a pCR4 TOPO vector  
558 (Thermo Fisher Scientific) following the manufacturer's instructions. Plasmid DNA from  
559 transformed *E. coli* cells were isolated according to the QIAprep Spin Miniprep Kit protocol  
560 (Qiagen). A restriction reaction was then set up to linearize the plasmid DNA. Using 1  $\mu$ g of  
561 linearized plasmid as a template, ssRNA was then synthesized using the MEGAscript T3 and T7  
562 kits. The synthesized ssRNA was cleaned using phenol/chloroform extraction and annealed to  
563 make a 2  $\mu$ g/ $\mu$ l solution as described previously (Hughes and Kaufman, 2000). Proper annealing  
564 was checked using gel electrophoresis.

565

### 566 *Microinjection of T. castaneum larvae*

567 Before injection with dsRNA, sixth and seventh instar *T. castaneum* larvae were first  
568 anesthetized on ice. A 10 $\mu$ L glass capillary needle was used to inject 0.5 $\mu$ L of dsRNA into  
569 seventh instar larvae and 0.25 $\mu$ L into sixth instar larvae. Control animals were also injected with  
570 the same volume of bacterial *ampicillin-resistance* (*amp<sup>r</sup>*) dsRNA.

571

### 572 *Knockdown verification*

573 In order to verify proper knockdown of *myo*, day 0 sixth instar *T. castaneum* larvae were injected  
574 with either *myo* or *amp<sup>r</sup>* dsRNA. RNA from three day 4 sixth instar larvae were collected and  
575 processed as outlined above. After converting 1  $\mu$ g of RNA into cDNA, PCR was run using *myo*  
576 and *rp49* primers listed in Table 2. For *rp49*, 20, 25 and 30 cycles were run; for *myo*, 30, 35 and  
577 40 cycles were run.

578

### 579 *Competing interests*

580 The authors declare that they have no competing interests

581

### 582 *Funding*

583 This work was funded by grants from Wellesley College and the National Science Foundation  
584 IOS-1354608 to Y.S.

585

### 586 *Acknowledgements*

587 We thank Drs. Kimberly O'Donnell, Louise Darling, Melissa Beers and Julie Roden for their  
588 helpful advice and discussions. We also thank the members of the Suzuki lab and Heidi Park for  
589 their support and comments on the manuscript.

590

591

## REFERENCES

- Augustin, H., McGourty, K., Steinert, J.R., Cocheme, H.M., Adcott, J., Cabecinha, M., Vincent, A., Halff, E.F., Kittler, J.T., Boucrot, E. and Partridge, L. 2017. Myostatin-like proteins regulate synaptic function and neuronal morphology. *Development* 144, 2445-2455.
- Burt Solorzano, C.M. and McCartney, C.R. 2010. Obesity and the pubertal transition in girls and boys. *Reproduction* 140, 399-410.
- Callier, V. and Nijhout, H.F. 2011. Control of body size by oxygen supply reveals size-dependent and size-independent mechanisms of molting and metamorphosis. *Proc. Natl. Acad. Sci. USA* 108, 14664-14669.
- Callier, V., Shingleton, A.W., Brent, C.S., Ghosh, S.M., Kim, J. and Harrison, J.F. 2013. The role of reduced oxygen in the developmental physiology of growth and metamorphosis initiation in *Drosophila melanogaster*. *J. Exp. Biol.* 216, 4334-4340.
- Chafino, S., Urena, E., Casanova, J., Casacuberta, E., Franch-Marro, X. and Martin, D. 2019. Upregulation of E93 gene expression acts as the trigger for metamorphosis independently of the threshold size in the beetle *Tribolium castaneum*. *Cell Rep.* 27, 1039-1049 e1032.
- Cheng, C., Ko, A., Chaieb, L., Koyama, T., Sarwar, P., Mirth, C.K., Smith, W.A. and Suzuki, Y. 2014. The POU factor ventral veins lacking/Drifter directs the timing of metamorphosis through ecdysteroid and juvenile hormone signaling. *PLoS Genet.* 10, e1004425.
- Cushman, R.A., Tait, R.G., Jr., McNeel, A.K., Forbes, E.D., Amundson, O.L., Lents, C.A., Lindholm-Perry, A.K., Perry, G.A., Wood, J.R., Cupp, A.S., Smith, T.P., Freetly, H.C. and Bennett, G.L. 2015. A polymorphism in myostatin influences puberty but not fertility in beef heifers, whereas micro-calpain affects first calf birth weight. *J. Anim. Sci.* 93, 117-126.
- Daimon, T., Kozaki, T., Niwa, R., Kobayashi, I., Furuta, K., Namiki, T., Uchino, K., Banno, Y., Katsuma, S., Tamura, T., Mita, K., Sezutsu, H., Nakayama, M., Itoyama, K., Shimada, T. and Shinoda, T. 2012. Precocious metamorphosis in the juvenile hormone-deficient mutant of the silkworm, *Bombyx mori*. *PLoS Genet.* 8, e1002486
- Daimon, T., Uchibori, M., Nakao, H., Sezutsu, H. and Shinoda, T. 2015. Knockout silkworms reveal a dispensable role for juvenile hormones in holometabolous life cycle. *Proc. Natl. Acad. Sci. USA* 112, E4226-4235.

- Euling, S.Y., Herman-Giddens, M.E., Lee, P.A., Selevan, S.G., Juul, A., Sorensen, T.I., Dunkel, L., Himes, J.H., Teilmann, G. and Swan, S.H. 2008. Examination of US puberty-timing data from 1940 to 1994 for secular trends: panel findings. *Pediatrics* 121, S172-191.
- Frazier, M.R., Woods, H.A. and Harrison, J.F. 2001. Interactive effects of rearing temperature and oxygen on the development of *Drosophila melanogaster*. *Physiol. Biochem. Zool.* 74, 641-650.
- Gibbens, Y.Y., Warren, J.T., Gilbert, L.I. and O'Connor, M.B. 2011. Neuroendocrine regulation of *Drosophila* metamorphosis requires TGFbeta/Activin signaling. *Development* 138, 2693-2703.
- Greenberg, S., Ar, A., 1996. Effects of chronic hypoxia, normoxia and hyperoxia on larval development in the beetle *Tenebrio molitor*. *J. Insect Physiol.* 42, 991-996.
- Grunert, L.W., Clarke, J.W., Ahuja, C., Eswaran, H. and Nijhout, H.F. 2015. A quantitative analysis of growth and size regulation in *Manduca sexta*: the physiological basis of variation in size and age at metamorphosis. *PLoS One* 10, e0127988.
- Harrison, J.F., Shingleton, A.W. and Callier, V. 2015. Stunted by Developing in Hypoxia: Linking Comparative and Model Organism Studies. *Physiol Biochem Zool* 88, 455-470.
- Hirsch, J. and Batchelor, B., 1976. Adipose tissue cellularity in human obesity. *Best Pract. Res. Clin. Endocrinol. Metab.* 5, 299-311.
- Hughes, C.L. and Kaufman, T.C. 2000. RNAi analysis of Deformed, proboscipedia and Sex combs reduced in the milkweed bug *Oncopeltus fasciatus*: novel roles for Hox genes in the Hemipteran head. *Development* 127, 3683-3694.
- Ishimaru, Y., Tomonari, S., Matsuoka, Y., Watanabe, T., Miyawaki, K., Bando, T., Tomioka, K., Ohuchi, H., Noji, S. and Mito, T. 2016. TGF-beta signaling in insects regulates metamorphosis via juvenile hormone biosynthesis. *Proc. Natl. Acad. Sci. USA* 113, 5634-5639.
- Kamsoi, O. and Belles, X. 2019. Myoglianin triggers the premetamorphosis stage in hemimetabolan insects. *FASEB J.* 33, 3659-3669.
- Kemirembe, K., Liebmann, K., Bootes, A., Smith, W.A. and Suzuki, Y. 2012. Amino acids and TOR signaling promote prothoracic gland growth and the initiation of larval molts in the tobacco hornworm *Manduca sexta*. *PLoS One* 7, e44429

- Kingsolver, J.G. 2007. Variation in growth and instar number in field and laboratory *Manduca sexta*. *Proc. Biol. Sci.* 274, 977-981.
- Konopova, B. and Jindra, M. 2007. Juvenile hormone resistance gene Methoprene-tolerant controls entry into metamorphosis in the beetle *Tribolium castaneum*. *Proc. Natl. Acad. Sci. USA* 104, 10488-10493.
- Konopova, B., Smykal, V. and Jindra, M. 2011. Common and distinct roles of juvenile hormone signaling genes in metamorphosis of holometabolous and hemimetabolous insects. *PLoS One* 6, e28728.
- Li, K.L., Yuan, S.Y., Nanda, S., Wang, W.X., Lai, F.X., Fu, Q. and Wan, P.J. 2018. The Roles of E93 and Kr-h1 in Metamorphosis of *Nilaparvata lugens*. *Front. Physiol.* 9, 1677.
- Lo, P.C., Frasch, M., 1999. Sequence and expression of myoglianin, a novel *Drosophila* gene of the TGF-beta superfamily. *Mech. Dev.* 86, 171-175.
- Lozano, J. and Belles, X. 2011. Conserved repressive function of Kruppel homolog 1 on insect metamorphosis in hemimetabolous and holometabolous species. *Sci. Rep.* 1, 163.
- McPherron, A.C., Lawler, A.M. and Lee, S.J. 1997. Regulation of skeletal muscle mass in mice by a new TGF-beta superfamily member. *Nature* 387, 83-90.
- Minakuchi, C., Namiki, T. and Shinoda, T. 2009. Kruppel homolog 1, an early juvenile hormone-response gene downstream of Methoprene-tolerant, mediates its anti-metamorphic action in the red flour beetle *Tribolium castaneum*. *Dev. Biol.* 325, 341-350.
- Minakuchi, C., Namiki, T., Yoshiyama, M. and Shinoda, T. 2008. RNAi-mediated knockdown of juvenile hormone acid O-methyltransferase gene causes precocious metamorphosis in the red flour beetle *Tribolium castaneum*. *FEBS J.* 275, 2919-2931.
- Moss-Taylor, L., Upadhyay, A., Pan, X., Kim, M.-J. and O'Connor, M.B. 2019. Motoneuron-derived Activin $\beta$  regulates *Drosophila* body size and tissue-scaling during larval growth and adult development. *Genetics* 213, 1447-1464.
- Nagamine, K., Ishikawa, Y. and Hoshizaki, S. 2016. Insights into how longicorn beetle larvae determine the timing of metamorphosis: starvation-induced mechanism revisited. *PLoS One* 11, e0158831.
- Namigai, E.K.O. and Suzuki, Y. 2012. Functional conservation and divergence of BMP ligands in limb development and lipid homeostasis of holometabolous insects. *Evol. Dev.* 14, 296-310.

- Nijhout, H.F., 1975. Threshold size for metamorphosis in tobacco hornworm, *Manduca sexta* (L). *Biol. Bull.* 149, 214-225.
- Ohtaki, T., Takeuchi, S. and Mori, K. 1971. Juvenile hormone and synthetic analogues: effects on larval moult of silkworm, *Bombyx mori*. *Jpn J Med Sci Biol* 24, 251-255.
- Riddiford, L.M. 1996. Juvenile hormone: The status of its "status quo" action. *Arch. Insect Biochem. Physiol.* 32, 271-286.
- Riddiford, L.M. and Ashburner, M. 1991. Effects of juvenile hormone mimics on larval development and metamorphosis of *Drosophila melanogaster*. *Gen. Comp. Endocrinol.* 82, 172-183.
- Santos, C.G., Fernandez-Nicolas, A. and Belles, X. 2016. Smads and insect hemimetabolism metamorphosis. *Dev. Biol.* 417, 104-113.
- Shafiei, M., Moczek, A.P. and Nijhout, H.F. 2001. Food availability controls the onset of metamorphosis in the dung beetle *Onthophagus taurus* (Coleoptera: Scarabaeidae). *Phys. Entomol.* 26, 173-180.
- Smykal, V., Daimon, T., Kayukawa, T., Takaki, K., Shinoda, T. and Jindra, M. 2014. Importance of juvenile hormone signaling arises with competence of insect larvae to metamorphose. *Dev. Biol.* 390, 221-230.
- Suzuki, Y., Koyama, T., Hiruma, K., Riddiford, L.M. and Truman, J.W. 2013. A molt timer is involved in the metamorphic molt in *Manduca sexta* larvae. *Proc. Natl. Acad. Sci. USA* 110, 12518-12525.
- Tan, A., Tanaka, H., Tamura, T., Shiotsuki, T., 2005. Precocious metamorphosis in transgenic silkworms overexpressing juvenile hormone esterase. *Proc. Natl. Acad. Sci. USA* 102, 11751-11756.
- Terao, M., Hirose, Y. and Shintani, Y. 2015. Food-availability dependent premature metamorphosis in the bean blister beetle *Epicauta gorhami* (Coleoptera: Meloidae), a hypermetamorphic insect that feeds on grasshopper eggs in the larval stage. *Entomological Science* 18, 85-93.
- Tomoyasu, Y. and Denell, R.E. 2004. Larval RNAi in *Tribolium* (Coleoptera) for analyzing adult development. *Dev. Genes Evol.* 214, 575-578.
- Whittemore, L.A., Song, K., Li, X., Aghajanian, J., Davies, M., Girgenrath, S., Hill, J.J., Jalenak, M., Kelley, P., Knight, A., Maylor, R., O'Hara, D., Pearson, A., Quazi, A., Ryerson, S.,



Tan, X.Y., Tomkinson, K.N., Veldman, G.M., Widom, A., Wright, J.F., Wudyka, S., Zhao, L. and Wolfman, N.M. 2003. Inhibition of myostatin in adult mice increases skeletal muscle mass and strength. *Biochem. Biophys. Res. Commun.* 300, 965-971.

## 1 **FIGURE LEGENDS**

2

3 **Figure 1. Nutritional conditions affect threshold size.** (A) A plot of mass at the end of the fourth  
4 instar vs developmental fate. (Top) Larvae fed a 40% diet during the third instar. (Middle) Larvae  
5 starved during the third instar starting day 1. (Bottom) Larvae fed a 40% diet throughout the larval  
6 instar. Red line indicates the threshold size for larvae fed a 40% diet throughout much of their  
7 larval life. “Supernumerary larval molt” indicates that the fifth instar larvae molted into another  
8 larval instar. “Last instar” indicates that the larvae initiated wandering at the end of the fifth instar.  
9 Larvae were tracked until they exhibited signs of pupation or initiated a supernumerary molt. (B)  
10 Experimental scheme. (C) The average masses of five larvae at the end of the fourth instar were  
11 plotted against the percentage of larvae that entered final larval instar. Solid black line represents  
12 larvae that were starved during the third instar. Solid gray line represents larvae that were fed a  
13 40% diet during the third instar. Dotted line represents larvae that were fed a 40% diet during the  
14 majority of the growth period. Triangles indicate the mass where 50% of larvae entered the final  
15 instar (i.e. threshold size). Lines represent Gompertz 3P model fits. Blue line represents threshold  
16 size of hypoxia-treated larvae.

17

18 **Figure 2. Third and fourth instar hypoxia-treated larvae have similar threshold sizes**  
19 **whereas 40% diet delays the attainment of threshold size.** (A) A plot of mass at the end of the  
20 fourth instar vs developmental fate. Red line indicates the threshold size for the hypoxia-treated  
21 larvae. Blue line indicates the threshold size for the 40% diet fed larvae. “Supernumerary larval  
22 molt” indicates that the fifth instar larvae molt into another larval instar. “Last instar” indicates  
23 that the larvae initiated wandering at the end of the fifth instar. (B) Scheme of experimental  
24 treatments. Lines represent duration of treatments. Larvae were subjected to hypoxic conditions  
25 for the duration of the third or fourth instar, or fed a 40% diet starting in early larval life, and  
26 tracked until they exhibited signs of wandering or initiated a supernumerary molt. (C) The moving  
27 average masses of five larvae at the end of the fourth instar were plotted against the percentage of  
28 larvae that entered final larval instar. Solid black line represents larvae that were placed in hypoxic  
29 condition during the third instar. Solid gray line represents larvae that were placed in hypoxic  
30 condition during the fourth instar. Dotted line represents larvae that were fed a 40% diet during

31 the majority of the growth period. Triangles indicate the mass where 50% of larvae entered the  
32 final instar (i.e. the threshold size). Lines represent Gompertz 3P model fits.

33

34 **Figure 3. The relative dry mass of muscles/integuments is reduced in larvae fed a 40% diet**

35 **relative to hypoxia-treated larvae.** (A) Dry mass of muscles/integuments plotted against wet

36 mass of fourth instar larvae. (B) Dry mass of fat body plotted against wet mass of fourth instar

37 larvae. Red lines represent the relationship between the threshold sizes (triangles) and

38 muscle/integument mass or fat body mass at the threshold sizes. Larvae were either placed in

39 hypoxic conditions during the third instar or reared on a 40% diet throughout much of the larval

40 stage. All dissections were performed at the end of the fourth instar. The dotted confidence

41 ellipses are drawn at the 95% confidence level.

42

43 **Figure 4. Expression of *myo* in normoxia/normal diet-fed *M. sexta* larvae.** (A) *Myo*

44 expression in the anterior half of the whole body was determined at HCS of the second, third and

45 fourth instar of untreated larvae. Error bars represent standard error. Expression represents mean

46 of three biological replicates, each with three technical replicates. (B-D) *Myo* expression in the

47 muscles (B), fat body (C) and CNS (D) of normoxia/normal diet-fed third and fourth instar

48 larvae. Error bars represent standard error. Expression represents mean of three or four biological

49 replicates, each with three technical replicates. \* indicates a statistically significant difference

50 (Student's t-test:  $p < 0.05$ ).

51

52 **Figure 5. *myo* expression in muscles is significantly elevated in post-threshold size larvae of**

53 **both hypoxia-treated larvae and larvae fed a 40% diet.** (A) *myo* expression in muscles, fat

54 body and the CNS of hypoxia-treated larvae. Larvae were reared under hypoxia conditions during

55 the third instar. (B) *myo* expression in muscles, fat body and the CNS of larvae fed a 40% diet.

56 (C) *myo* expression in muscles and fat body of hypoxia-treated and 40% diet-fed larvae weighing

57 0.7 g to 0.8 g. At this weight range, hypoxia-treated larvae are above the threshold size whereas

58 40% diet-fed larvae are below the threshold size. For all samples, larvae were dissected at the

59 end of the fourth instar when the larvae began to initiate a molt. Expression represents mean of

60 4-5 biological replicates. Each biological replicate was run with three technical replicates.

61 Student's t-test: \* denotes  $p < 0.05$ ; \*\* denotes  $p < 0.01$ ; \*\*\* denotes  $p < 0.005$ .

62

63 **Figure 6. *myo* is upregulated in post-threshold size *T. castaneum* larvae.** (A) Determination  
64 of threshold size. *T. castaneum* undergo variable number of molts passing through at least seven  
65 instars. On day 1 of the final instar, *T. castaneum* larvae undergo pupal commitment (Kamsoi  
66 and Belles, 2019). If larvae undergo pupation at the end of the instar, the larval weight on day 1  
67 must be the threshold size. The moving average masses of five day 1 seventh instar larvae were  
68 plotted against the percentage of larvae that pupated. Our data show that at 2.1 mg, 50% of  
69 larvae have reached the pupal commitment point, indicating that if seventh instar larvae have  
70 reached 2.1 mg at the time of the molt, they must have reached the threshold size. (B)  
71 Determination of *myo* in freshly molted sixth instar (below the threshold size) and seventh instar  
72 larvae above 2.1 mg (above the threshold size). Expression represents the whole body minus the  
73 gut and fat body. \* denotes statistically significant difference (Student's t-test:  $p < 0.05$ ).

74

75 **Figure 7. Knockdown of *myo* results in molting delays and prolonged larval stage of *T.***  
76 ***castaneum*.** (A) Knockdown verification showing that *myo* dsRNA injection leads to reduced  
77 expression of *myo* in *myo* dsRNA-injected larvae relative to *amp<sup>r</sup>* dsRNA-injected larvae. Cycle  
78 number used in gel image: *myo* = 35 cycles; *rp49* = 25 cycles. (B) Duration of each larval instar  
79 post dsRNA injection. Bars represent the average duration of each larval instar. Averages were  
80 combined for larvae that pupated after the seventh and eighth instar because the duration of each  
81 instar did not differ between the groups. *amp<sup>r</sup>* dsRNA-injected larvae were used as the control.  
82 Error bars represent standard error. (C) Duration of larval period in *amp<sup>r</sup>* and *myo* dsRNA-  
83 injected larvae. Three of the *myo* dsRNA-injected larvae were still alive after 215 days (7  
84 months). Day 0 sixth instar larvae were injected with 0.25  $\mu$ L of dsRNA using a 10  $\mu$ L glass  
85 capillary needle. (D) Growth trajectory of *myo* and *amp<sup>r</sup>* dsRNA-injected larvae. Lines represents  
86 average larval masses for each time point: black lines represent *amp<sup>r</sup>* dsRNA-injected larvae that  
87 underwent two larval molts post dsRNA injections prior to metamorphosis; dotted lines represent  
88 *amp<sup>r</sup>* dsRNA-injected larvae that underwent one larval molt post dsRNA injections prior to  
89 metamorphosis; gray lines represent *vvl* dsRNA-injected larvae. Filled circles represent *amp<sup>r</sup>*  
90 dsRNA-injected larvae; "X" represents prepupal masses of *amp<sup>r</sup>* dsRNA-injected larvae; open  
91 circles represent *myo* dsRNA-injected larvae. (E) Fate of larvae at different masses. Larvae were  
92 weighed one day after a molt. Filled circles represent *amp<sup>r</sup>* dsRNA-injected larvae; open circles

93 represent *myo* dsRNA-injected larvae. Each larva may be represented by several circles if they  
94 continued to undergo multiple supernumerary molts.

95

96 **Figure 8. Hypothetical model for how growth of the body is coupled to initiation of**

97 **metamorphosis.** In organisms undergoing determinate growth, the growth phase and the

98 reproductive phases are temporally separated. In this model, the growing tissues (primarily

99 muscles) produce increasing amounts of Myo. Once a threshold level is reached, Myo triggers

100 the end of the growth phase by affecting the neuroendocrine regulators of metamorphosis.

101 Because the same factor acts as both an indicator of growth and initiator of metamorphosis,

102 metamorphosis can be triggered precisely at the threshold size. Dotted line indicates potential

103 positive autocrine feedback.

104

105

**Figure 1**

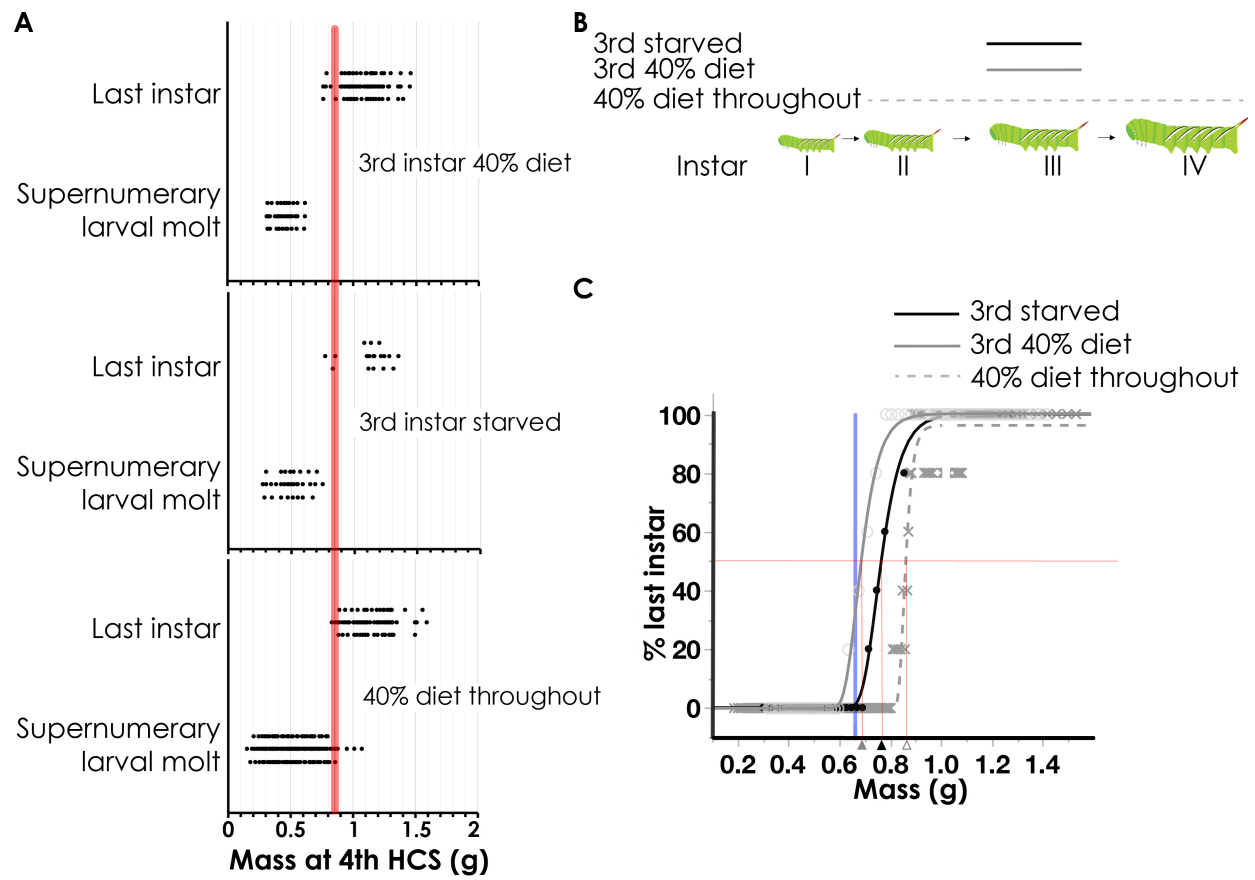

**Figure 2**

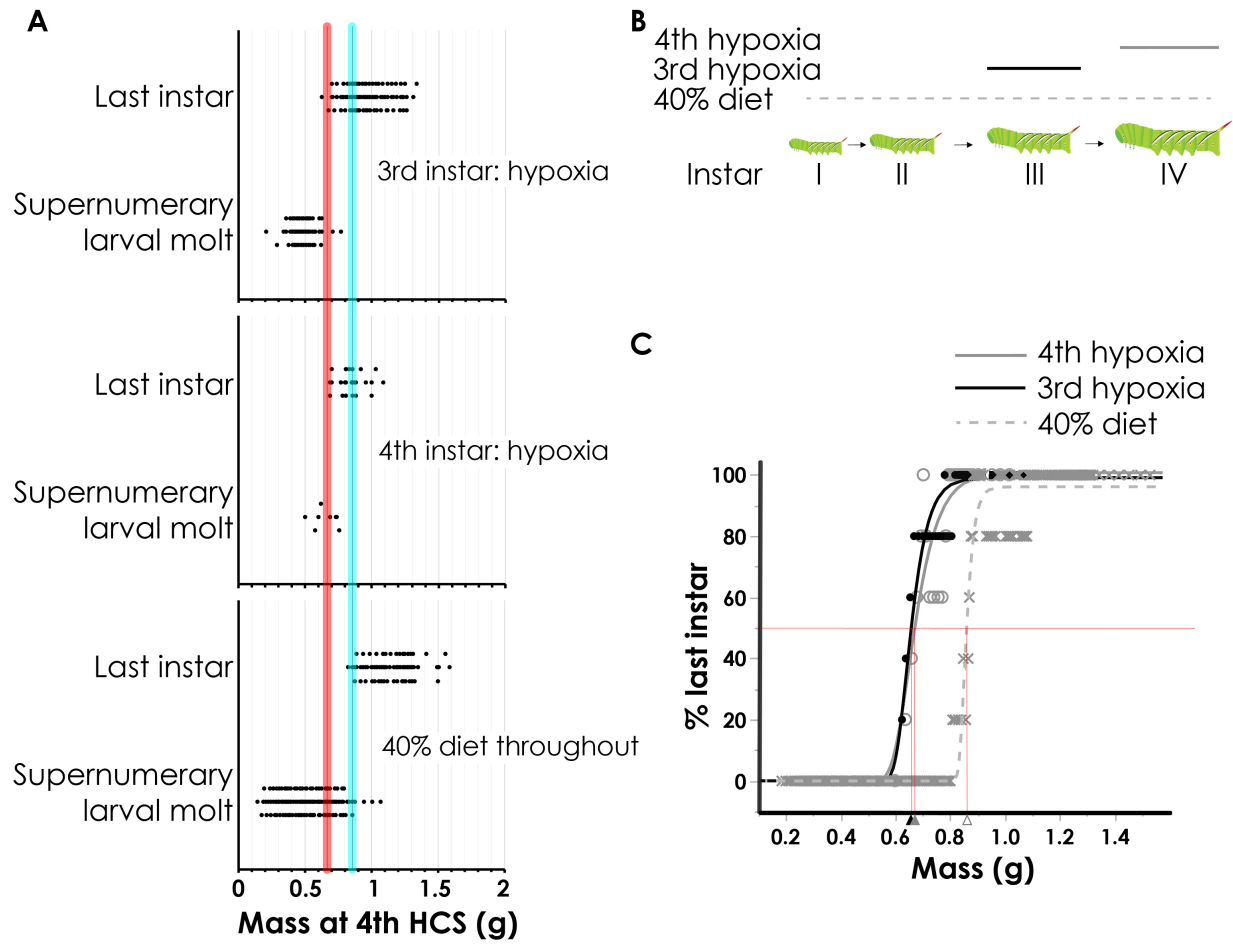

Figure 3

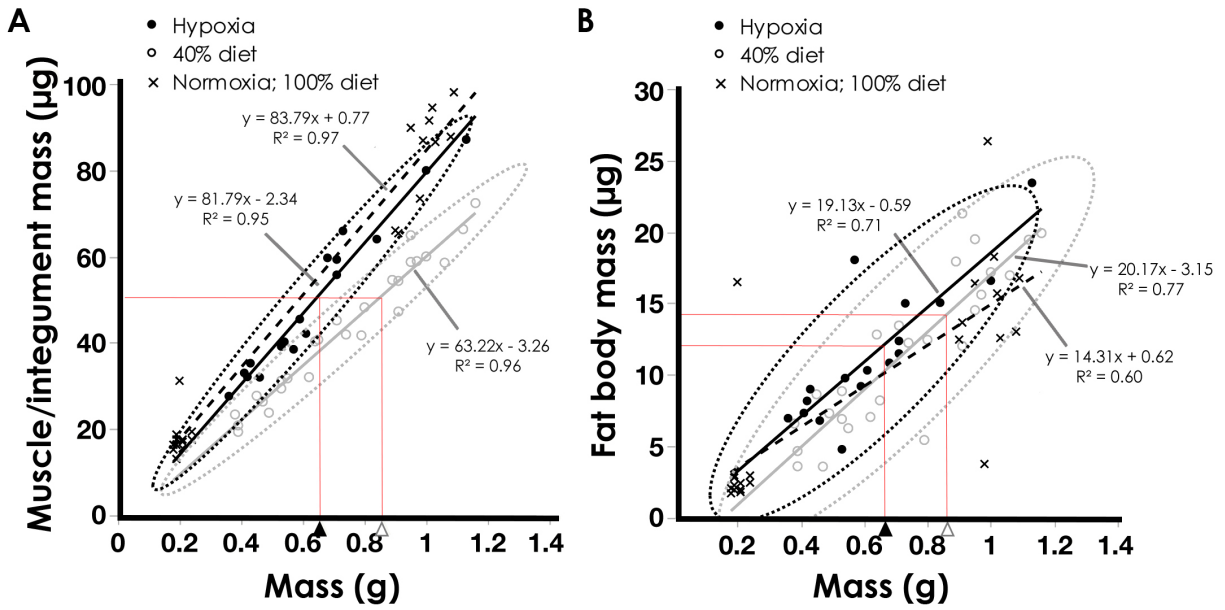



**Figure 4**

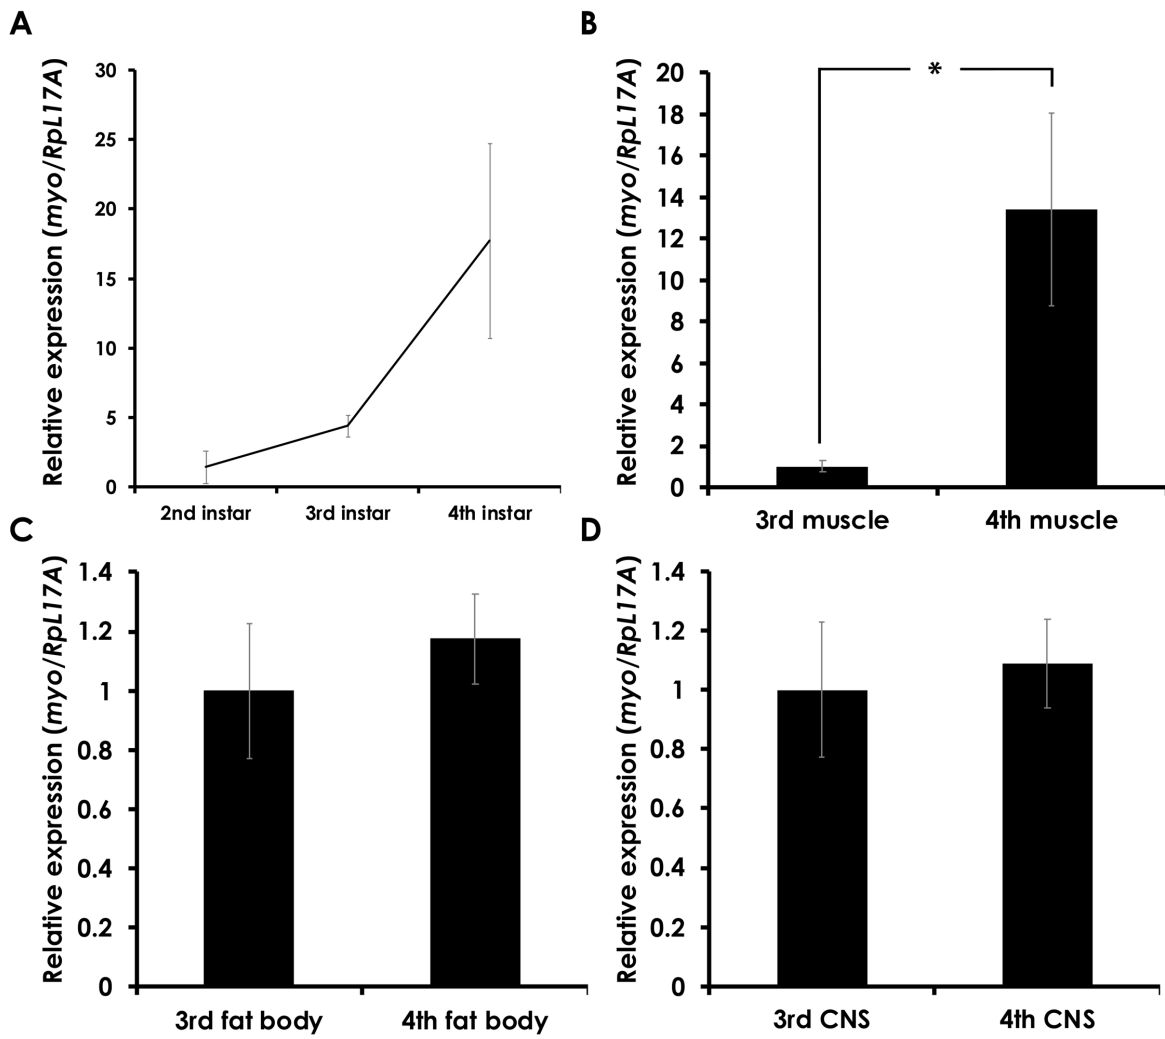

Figure 5

**A. Hypoxia-treated larvae**

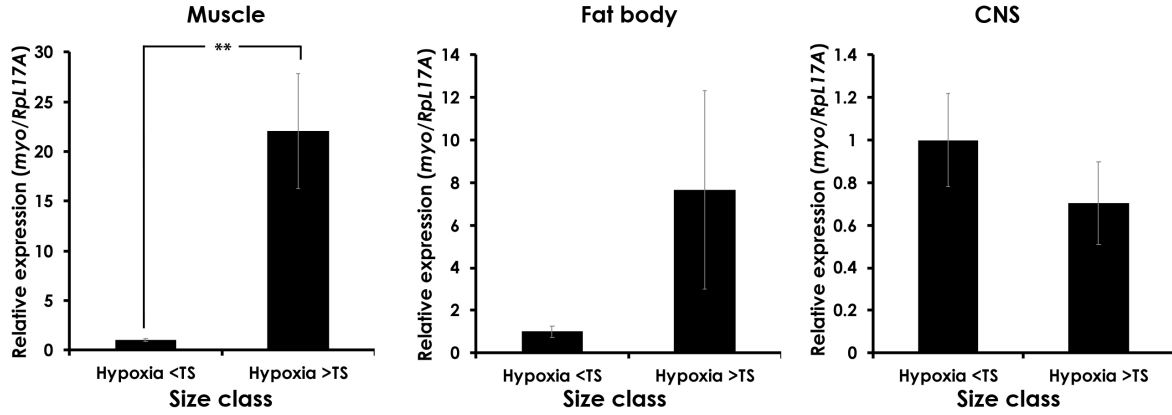

**B. 40% diet-fed larvae**

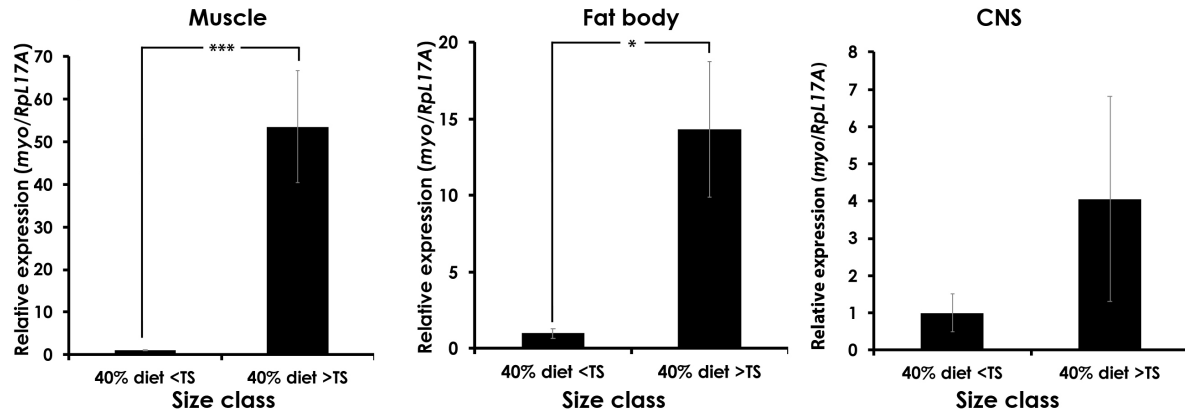

**C. Hypoxia-treated and 40% diet fed larvae at 0.7g-0.8g**

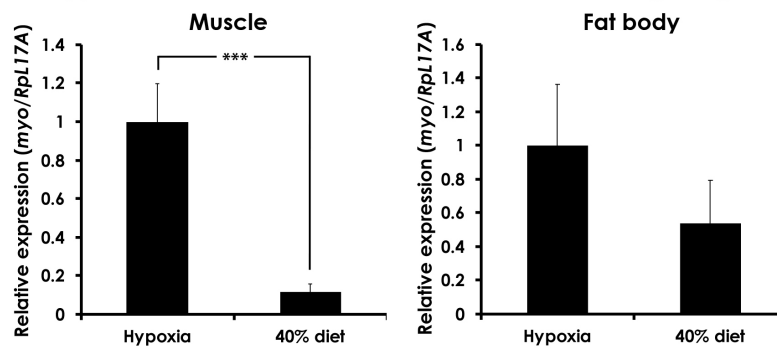

**Figure 6**

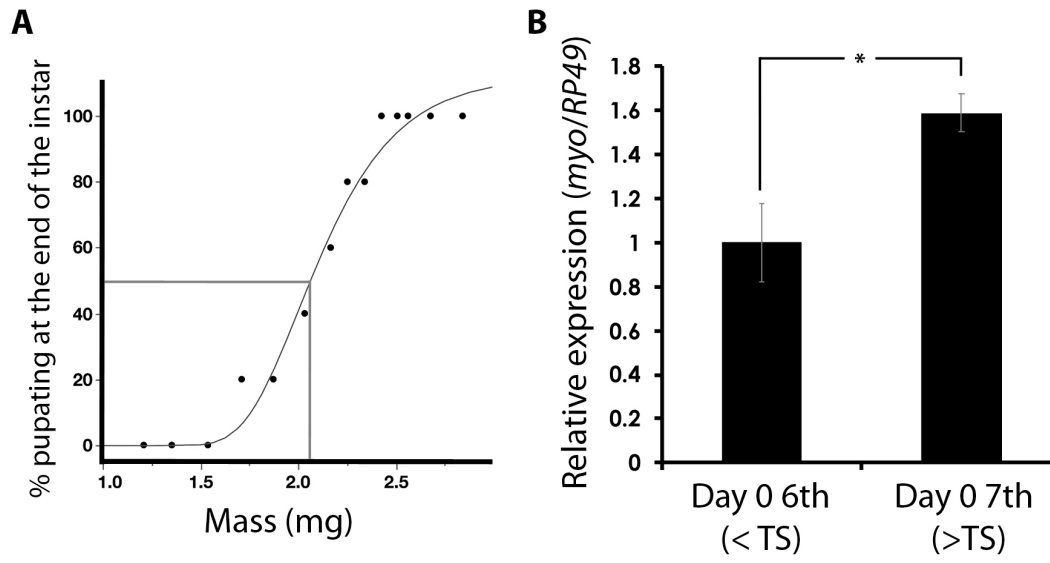

Figure 7

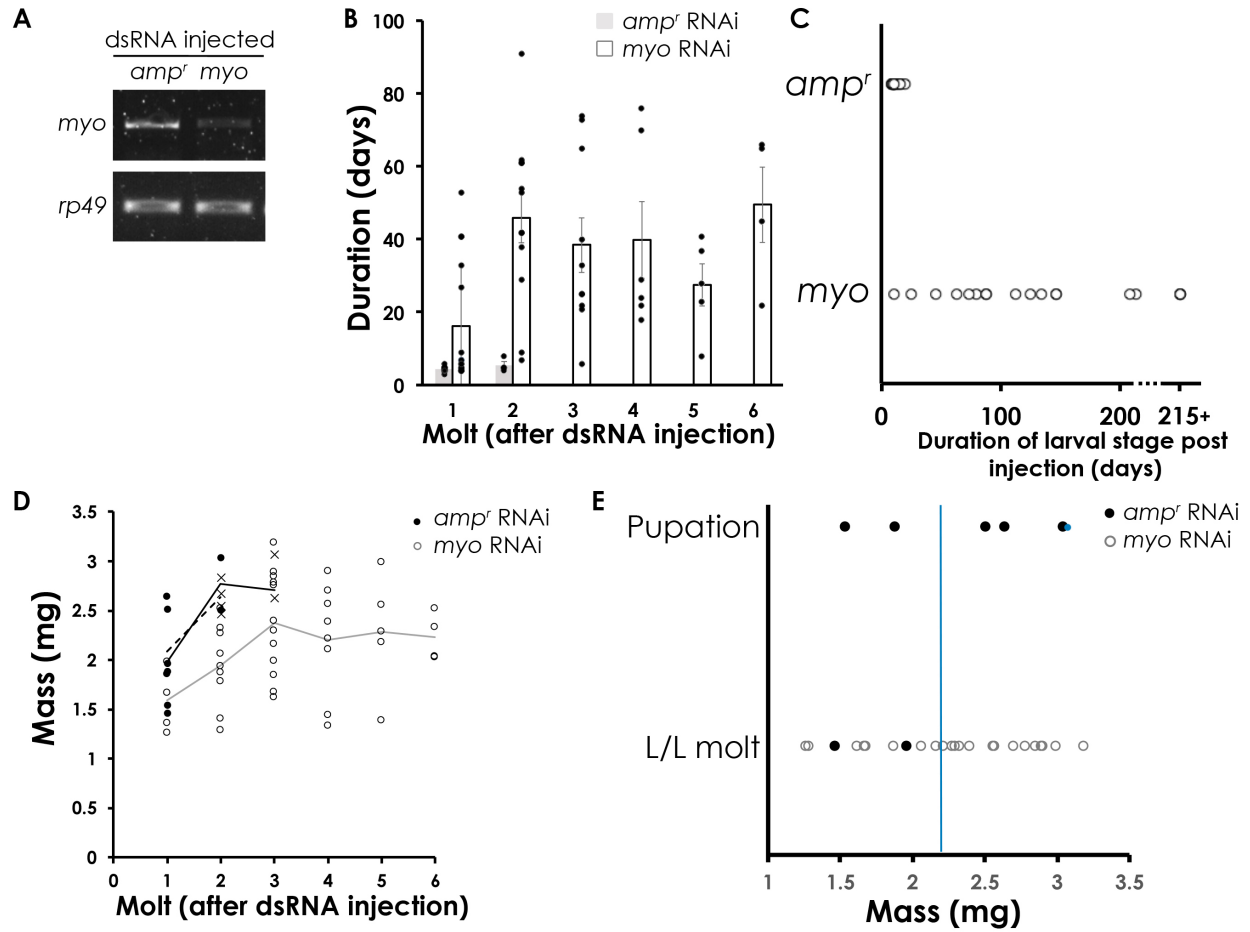

Figure 8

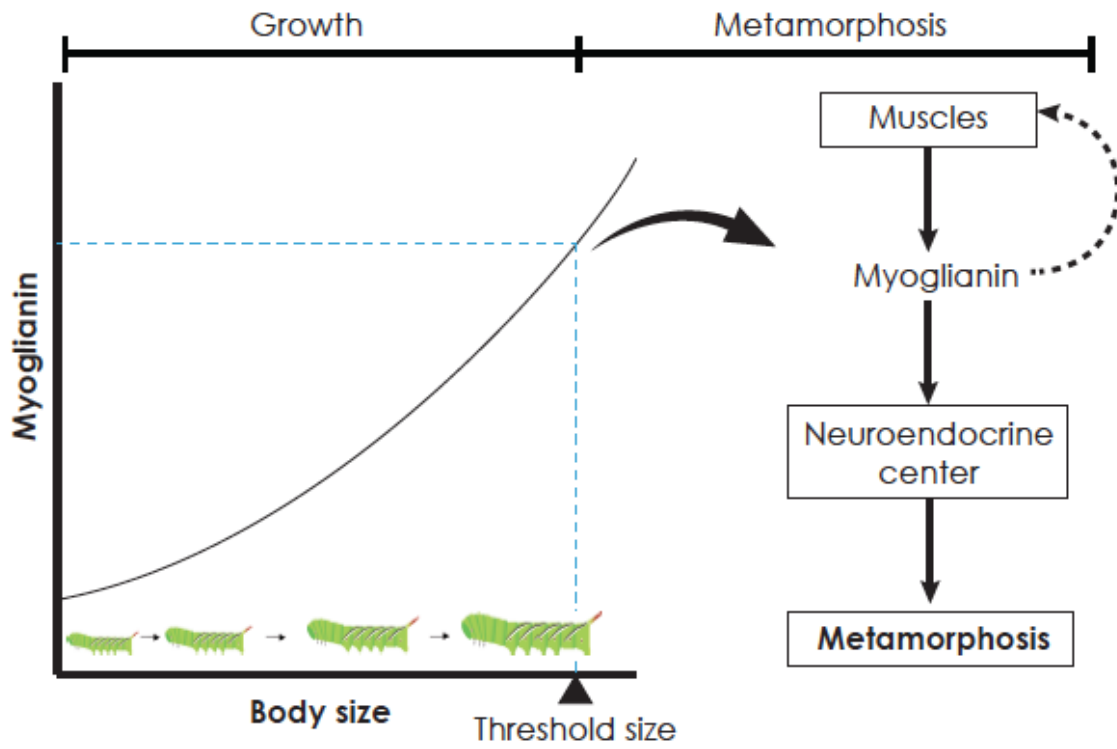

106 **Table 1. Summary of molting events in *myo* knockdown larvae.** Sixth and seventh instar  
 107 larvae were injected with *myo* or *amp<sup>r</sup>* dsRNA. Injected animals were checked daily for molts,  
 108 prepupal formation and death.

| dsRNA                  |                       |            | Pupating larvae            |                               |                                | Larvae that never pupated and died as larvae |               |                          |
|------------------------|-----------------------|------------|----------------------------|-------------------------------|--------------------------------|----------------------------------------------|---------------|--------------------------|
|                        | Stage injected        | # injected | # pupating without molting | # molted once before pupation | # molted twice before pupation | # never molted                               | # molted once | # molted more than twice |
| <i>amp<sup>r</sup></i> | Day 0 6 <sup>th</sup> | 18         | -                          | 11                            | 4                              | -                                            | 3             | -                        |
|                        | Day 0 7 <sup>th</sup> | 7          | 7                          | -                             | -                              |                                              |               | -                        |
| <i>myo</i>             | Day 0 6 <sup>th</sup> | 18         | -                          | -                             | -                              | 3                                            | 4             | 11                       |
|                        | Day 0 7 <sup>th</sup> | 6          | -                          | -                             | -                              |                                              | 4             | 2                        |

109

110

111

## SUPPORTING INFORMATION

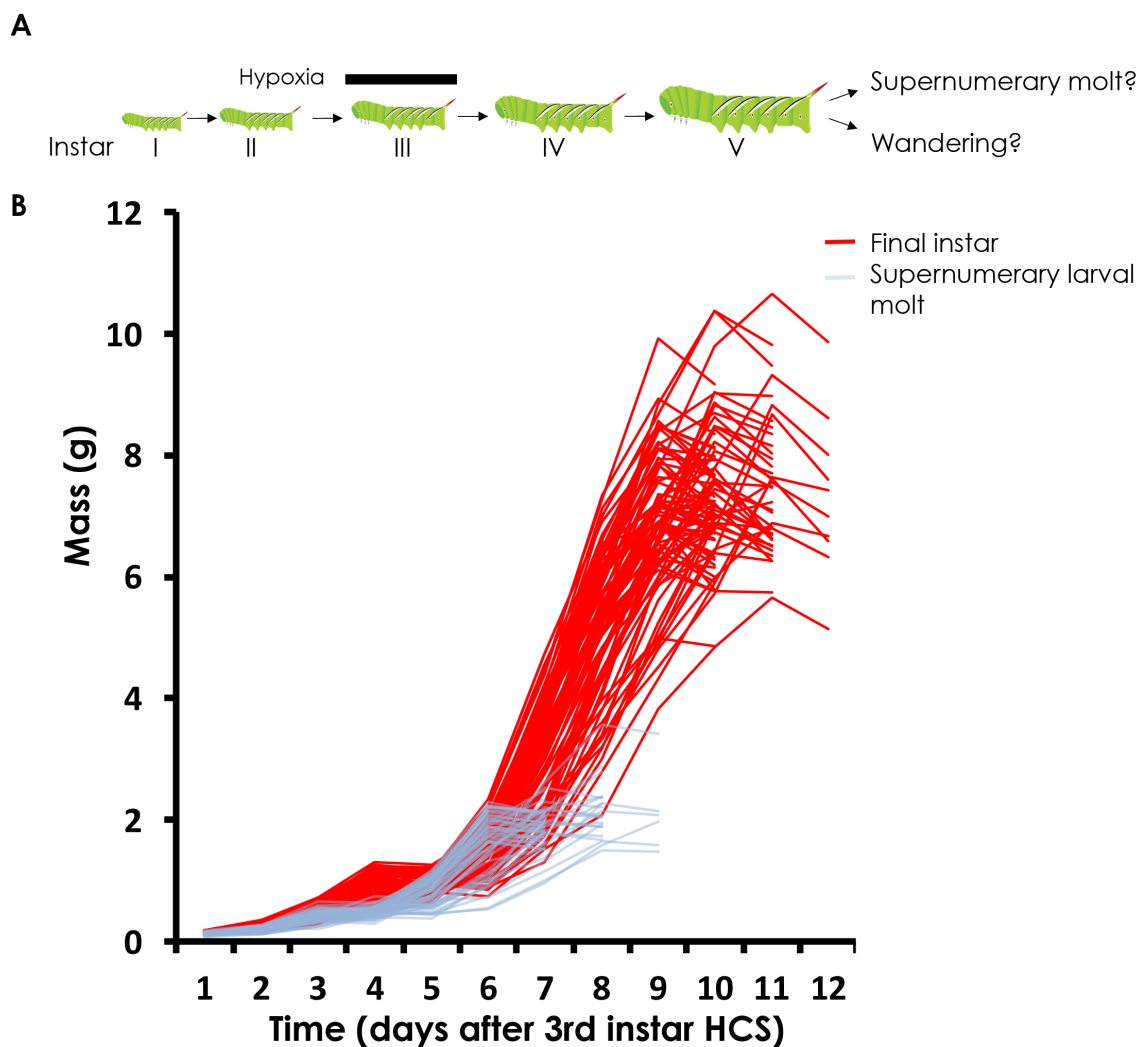

**Supplemental figure S1. Hypoxia generates two developmental trajectories for *Manduca sexta*.** (A) A scheme showing the timing of hypoxia treatment. (B) Individual growth trajectories of larvae that underwent wandering (red) or supernumerary molt at the end of the fifth instar (light blue). Larvae were subjected to hypoxic conditions from the beginning to the end of the third instar. Masses were recorded at the end of the third instar and every day after.

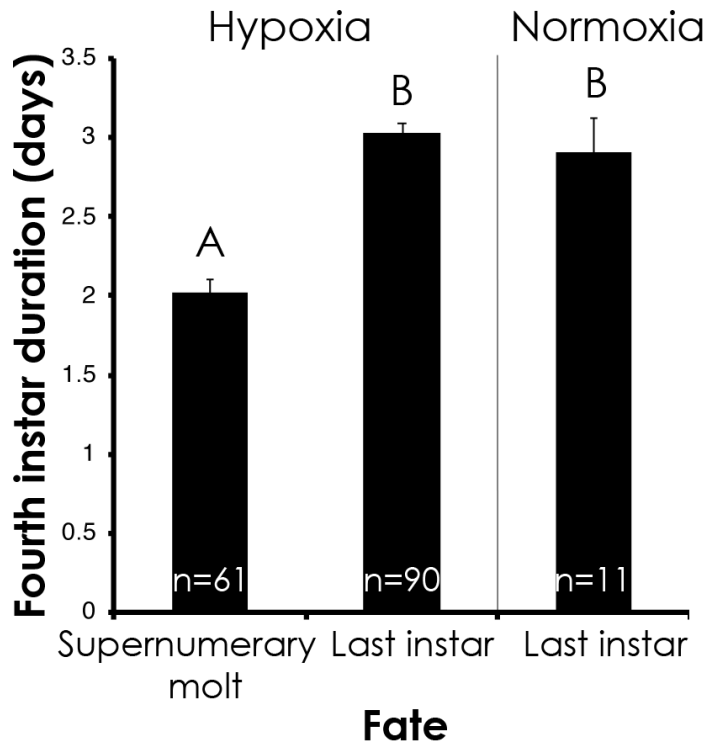

**Supplemental figure S2. Fourth instar duration predicts developmental fate of the larva.** Fourth instar duration (mean±SE) of larvae that wandered at the end of the fifth instar (denoted “last instar” and those that underwent a supernumerary molt (denoted “supernumerary larval molt”) are shown for larvae that were reared under hypoxic or normoxic conditions during the third instar. Days were counted from day 0 of the fourth instar. One-way ANOVA:  $F(2,159) = 125.556$ ,  $p < 0.0001$ . Means not sharing the same letter are statistically significant (Tukey HSD,  $p < 0.0001$ ).



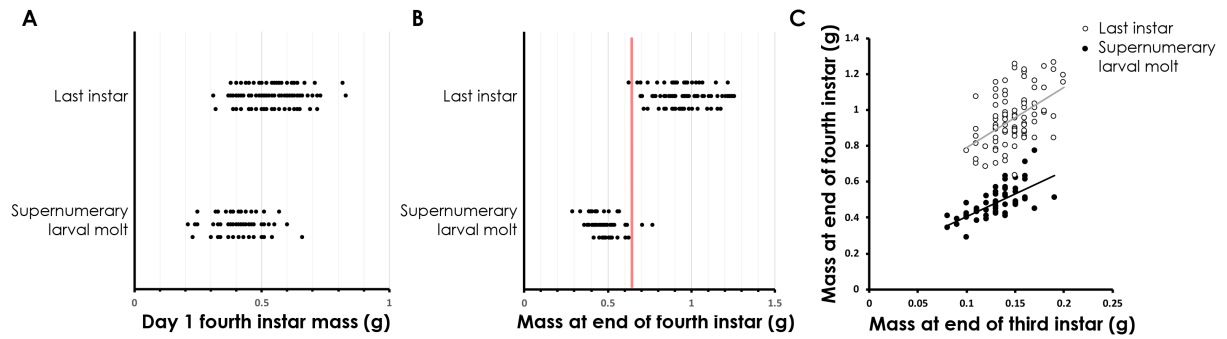

**Supporting figure S3. Mass at the end of the fourth instar predicts the developmental fates of larvae.** (A) The mass at first day of the fourth instar is a poor predictor of nature of subsequent molt. “Supernumerary larval molt” denotes fifth instar larvae that molted into another larval instar. “Last instar” denotes fifth instar that initiated wandering. (B) The decision to enter supernumerary stage is made at the end of the fourth instar. Red line indicates the estimated threshold size. (C) A plot of mass at the end of the third instar vs mass at the end of the fourth instar, showing that the mass at the end of the third instar is a poor predictor of threshold size. Filled circles are larvae that underwent a supernumerary larval molt; open circles denote larvae that wandered at the end of the fifth instar. All larvae were subjected to hypoxic conditions during the third instar and then tracked for supernumerary molt/wandering.

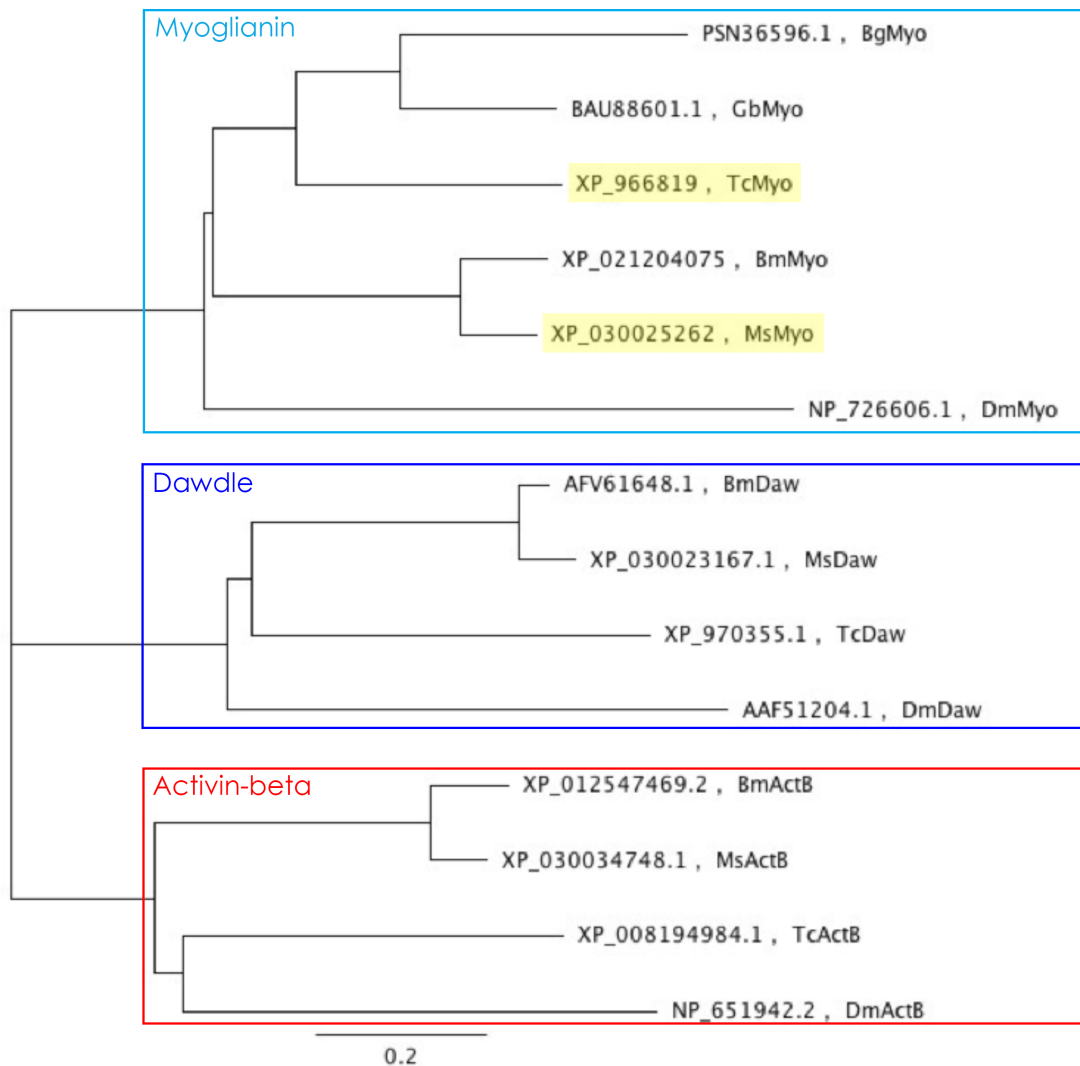

**Supplemental figure S4. Phylogenetic tree of the three Activin ligands, Activin-beta (ActB), Dawdle (Daw) and Myoglianin (Myo) predicted from genome sequences of *Drosophila melanogaster* (Dm), *Blattella germanica* (Bg), *Gryllus bimaculatus* (Gb), *Tribolium castaenum* (Tc), *Bombyx mori* (Bm) and *Manduca sexta* (Ms).**

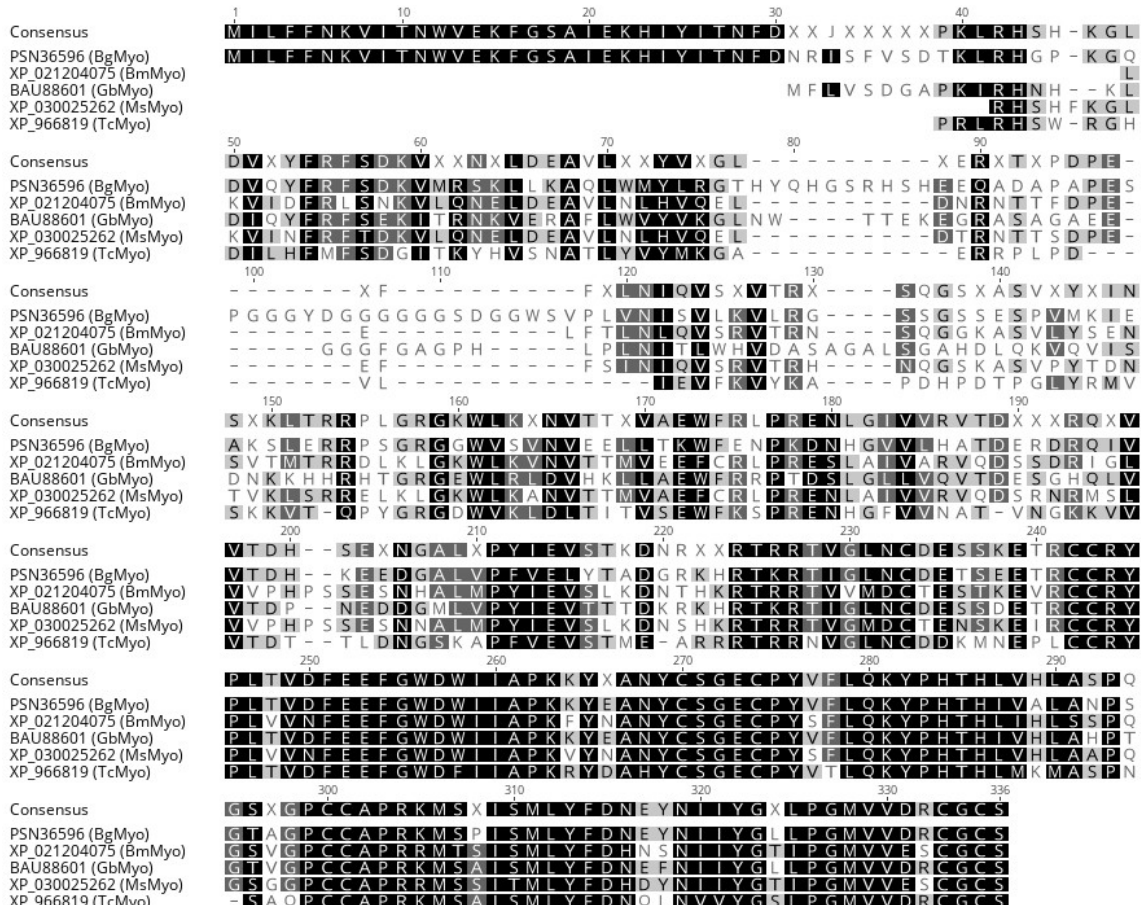

**Supplemental figure S5. Amino acid alignment of Myoglianin from *Blattella germanica* (Bg), *Bombyx mori* (Bm), *Gryllus bimaculatus* (Gb), *Manduca sexta* (Ms) and *Tribolium castaneum* (Tc).**

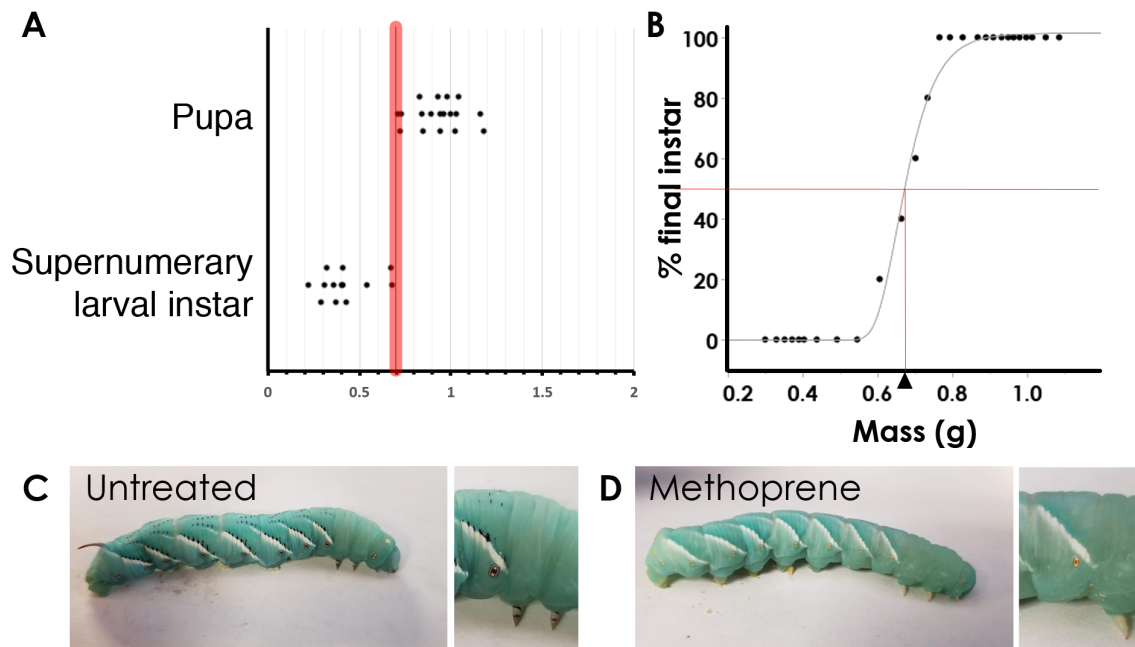

**Supporting figure S6. Methoprene does not shift the threshold size.** (A) Threshold size determination in methoprene-treated larvae that had undergone hypoxia treatment during the third instar. (B) The average masses of five larvae at the end of the fourth instar were plotted against the percentage of larvae that entered final larval instar. Triangle indicates the threshold size when 50% of the larvae wander at the end of the fifth instar. Line represents a Gompertz 3P model fit. (C) A normal fifth instar larva, showing the melaninic markings on the dorsal side and the legs. (D) A fifth instar that had been treated with methoprene. This larva weighed 1.18 g at 4th HCS, well above the threshold size. Methoprene was applied on the dorsal side two days after 3rd instar HCS.

**Table S1: Ingredients for experimental diets used in this study.** Percentages based on a standard (100%) diet described by Yamamoto et al (1969)

| Ingredient           | 100% diet | 40% diet |
|----------------------|-----------|----------|
| Gelcarin (g)         | 7.85      | 7.85     |
| Distilled water (mL) | 500       | 500      |
| Wheat germ (g)       | 53.8      | 21.52    |
| Casein (g)           | 24.2      | 9.68     |
| Sucrose (g)          | 21.5      | 21.5     |
| Torula yeast (g)     | 10.75     | 10.75    |
| Cholesterol (g)      | 2.36      | 2.36     |
| Wesson salt (g)      | 8.05      | 8.05     |
| Sorbic acid (g)      | 1.35      | 1.35     |
| Methyl paraben (g)   | 0.65      | 0.65     |
| Ascorbic acid (g)    | 3.35      | 3.35     |
| Streptomycin (g)     | 0.135     | 0.135    |
| Kanamycin (g)        | 0.035     | 0.035    |
| Formaldehyde (mL)    | 1.07      | 1.07     |
| Linseed oil (mL)     | 0         | 0        |
| Vitamin mixture (mL) | 5         | 5        |

**Table S2: Primer sequences used in this study.** \*Sequences from Ono et al (2006). \*\*Sequences from Parthasarathy et al (2008).

| Gene             | Purpose                | Direction | Sequence                    |
|------------------|------------------------|-----------|-----------------------------|
| <i>MsMyo</i>     | qPCR                   | Forward   | 5'-TACGCCTGGTTCGCTTGT-3'    |
|                  |                        | Reverse   | 5'-CTGCCACGGGAGAATTTAG-3'   |
| <i>Msrpl17A*</i> | qPCR                   | Forward   | 5'-TCCGCATCTCACTGGGTCT-3'   |
|                  |                        | Reverse   | 5'-CACGGCAATCACATACAGGTT-3' |
| <i>Tcmyo</i>     | RNAi                   | Forward   | 5'-CCACGACATCCTCCACTTC-3'   |
|                  |                        | Reverse   | 5'-TACGGCTGGGTGACTTTCT-3'   |
| <i>Tcmyo</i>     | Knockdown verification | Forward   | 5'-GAGGAGGAGGACGACTACCA-3'  |
|                  |                        | Reverse   | 5'-TTCGGAGCGATGATGAAG-3'    |
| <i>Tcrp49**</i>  | Knockdown verification | Forward   | 5'-TGACCGTTATGGCAAACCTCA-3' |
|                  |                        | Reverse   | 5'-TAGCATGTGCTTCGTTTTGG-3'  |

#### REFERENCES FOR SUPPORTING INFORMATION

1. Yamamoto, R.T. (1969) Mass rearing of the tobacco hornworm. II. Larval rearing and pupation. *J. Econ. Entomol.* 62, 1427-1431.
2. Ono, H., Rewitz, K. F., Shinoda, T., Itoyama, K., Petryk, A., Rybczynski, R., et al. (2006) Spook and Spookier code for stage-specific components of the ecdysone biosynthetic pathway in Diptera. *Dev Biol* 298:555-570.

3. Parthasarathy, R., Tan, A., Bai, H., and Palli, S.R. (2008) Transcription factor broad suppresses precocious development of adult structures during larval-pupal metamorphosis in the red flour beetle, *Tribolium castaneum*. *Mech. Develop.* 125, 299-313.
